# Supplementary material for: An expanded mammal mitogenome dataset from Southeast Asia
Source: PubMed Central journal article supplement (PMC5737531; doi:10.1093/gigascience/gix053), 2017-07-13

1  
2  
3  
4  
5  
6  
7  
8  
9  
10  
11  
12  
13  
14  
15  
16  
17  
18  
19  
20  
21  
22  
23  
24  
25  
26  
27  
28  
29  
30  
31  
32  
33  
34  
35  
36  
37  
38  
39  
40  
41  
42  
43  
44  
45  
46  
47  
48  
49  
50  
51  
52  
53  
54  
55  
56  
57  
58  
59  
60  
61  
62  
63  
64  
65

1 **Title: An expanded mammal mitogenome dataset from Southeast Asia**

2 Faezah Mohd Salleh<sup>1,2\*</sup>, Jazmín Ramos-Madrigal<sup>1</sup>, Fernando Peñaloza<sup>3,4</sup>, Shanlin Liu<sup>1,5</sup>, Mikkel-Holger S.  
3 Sinding<sup>1,6</sup>, Riddhi P. Patel<sup>3,7</sup>, Renata Martins<sup>3</sup>, Dorina Lenz<sup>3</sup>, Christian Roos<sup>8</sup>, Mohd Shahir Shamsir<sup>2</sup>,  
4 Mohammad Shahfiz Azman<sup>9</sup>, Burton K. Lim<sup>10</sup>, Stephen J. Rossiter<sup>11</sup>, Andreas Wilting<sup>3</sup>, M. Thomas P.  
5 Gilbert<sup>1,12\*</sup>

6 \*Correspondence: [faezah@fbb.utm.my](mailto:faezah@fbb.utm.my) and [tgilbert@snm.ku.dk](mailto:tgilbert@snm.ku.dk)

7  
8 <sup>1</sup>Centre for GeoGenetics, Natural History Museum of Denmark, University of Copenhagen, Øster  
9 Voldgade 5-7, 1350, Copenhagen, Denmark

10 <sup>2</sup>Faculty of Biosciences and Medical Engineering, Universiti Teknologi Malaysia, 81310 Johor Bahru,  
11 Johor, Malaysia

12 <sup>3</sup>Leibniz Institute for Zoo and Wildlife Research, Alfred-Kowalke Strasse 17, 10315 Berlin, Germany.

13 <sup>4</sup>Undergraduate Program on Genomic Sciences, Universidad Nacional Autonoma de Mexico, 62210  
14 Cuernavaca, Mexico

15 <sup>5</sup>BGI-Shenzhen, Shenzhen, GuangDong, China

16 <sup>6</sup>Natural History Museum, University of Oslo, P.O. Box 1172 Blindern, NO-0318, Oslo, Norway

17 <sup>7</sup>Freie Universität Berlin, Kaiserswerther Str. 16-18, 14195 Berlin, Germany

18 <sup>8</sup>Gene Bank of Primates and Primate Genetics Laboratory, German Primate Center, Leibniz Institute for  
19 Primate Research, Kellnerweg 4, 37077, Göttingen, Germany

20 <sup>9</sup>Forest Biodiversity Division, Forest Research Institute Malaysia, 52109 Kepong, Selangor, Malaysia.

21 <sup>10</sup>Department of Natural History, Royal Ontario Museum, Toronto, Canada

22 <sup>11</sup>School of Biological and Chemical Sciences, Queen Mary University of London, Mile End Road, London  
23 E1 4NS, United Kingdom

24 <sup>12</sup>NTNU University Museum, Norwegian University of Science and Technology, Trondheim, Norway

25

26

27

28

1  
2  
3  
4  
5  
6  
7  
8  
9  
10  
11  
12  
13  
14  
15  
16  
17  
18  
19  
20  
21  
22  
23  
24  
25  
26  
27  
28  
29  
30  
31  
32  
33  
34  
35  
36  
37  
38  
39  
40  
41  
42  
43  
44  
45  
46  
47  
48  
49  
50  
51  
52  
53  
54  
55  
56  
57  
58  
59  
60  
61  
62  
63  
64  
65

**29 Abstract**

**30 Background:**

31 Southeast (SE) Asia is one of the most biodiverse regions in the world and it holds approximately 20% of  
32 all mammal species. Despite this, the majority of South East (SE) Asia's genetic diversity is still poorly  
33 characterised. The growing interest in using environmental DNA (eDNA) to assess and monitor SE Asian  
34 species, in particular threatened mammals - has created the urgent need to expand the available  
35 reference database of mitochondrion barcode and complete mitogenome sequences. We have  
36 contributed to this need, by generating 75 new mitogenome sequences reconstructed from DNA isolated  
37 from a range of historical and modern tissue samples.

**38 Findings:**

39 Approximately 56 gigabases of raw sequence were generated. From this data we assembled 75 complete  
40 mitogenome sequences, with an average depth of coverage of 102.9x and 55.2x for modern samples and  
41 historical samples, respectively. This dataset represents 55 species, of which 32 species have currently  
42 no mitogenome available. The mitogenomes were geotagged to their sampling location, where known, to  
43 display a clearer geographical distribution of the species.

**44 Conclusion:**

45 Our new database of 55 taxa will greatly enhance the utility of eDNA approaches for monitoring mammals  
46 in SE Asia, as it greatly increases the likelihoods that identification of metabarcoding sequencing reads  
47 can be assigned to reference sequences. This magnifies the confidence in species detections and thus  
48 allows more robust surveys and monitoring programmes of SE Asia's threatened mammal biodiversity.  
49 The extensive collections of historical samples from SE Asia in western and SE Asian museums should  
50 serve as additional valuable material to further enrich this reference database.

**51 Keywords:**

52 invertebrate-derived (iDNA), metabarcoding, Malaysia, GenBank, Taxonomic assignment

1  
2  
3  
4  
5  
6  
7  
8  
9  
10  
11  
12  
13  
14  
15  
16  
17  
18  
19  
20  
21  
22  
23  
24  
25  
26  
27  
28  
29  
30  
31  
32  
33  
34  
35  
36  
37  
38  
39  
40  
41  
42  
43  
44  
45  
46  
47  
48  
49  
50  
51  
52  
53  
54  
55  
56  
57  
58  
59  
60  
61  
62  
63  
64  
65

**57 Data description:**

**58 Context**

59 Southeast (SE) Asia is one of the most biodiverse regions in the world, hosting ~20% of mammal species,  
60 but is experiencing rapid deforestation for agriculture and development. To assess the ecological  
61 consequences of land-use change, there is growing interest in using environmental DNA (eDNA) to  
62 monitor mammal populations, particularly threatened taxa that often underpin conservation policies. Yet  
63 current efforts are hampered by the lack of a reference database of mitochondrion barcodes and  
64 complete mitogenome sequences. We have contributed to this need, by generating 75 new mitogenome  
65 sequences reconstructed from DNA isolated from a range of historical and modern tissue samples.

**67 DNA extraction**

68 Genomic DNA was extracted from different sample types of 75 small mammals, comprising 55 species,  
69 listed in [Table 1](#) and [Table 2](#). DNA from modern tissue and blood samples was isolated using the Qiagen  
70 DNeasy extraction kit (Qiagen, Hilden, Germany) or Invitex DNA extraction kit (Invitex GmbH, Berlin,  
71 Germany), as per standard protocols. Historical samples obtained from the Zoological Museum, Natural  
72 History Museum of Denmark, University of Copenhagen (ZM, KU) were treated differently according to  
73 type of tissue ([Additional file 1a](#)), while at the German Primate Center DNA extraction from museum  
74 specimens followed Liedigk et al. (2015) [1]. Complete details of sample information are provided in  
75 [Additional file 2](#).

**77 Mitogenome sequencing, assembly and annotation**

78 Mitogenomes were generated using several approaches. In Copenhagen, author FMS constructed  
79 Illumina shotgun libraries with insert sizes ranging between 50 bp to 400 bp. To construct libraries, DNA  
80 was sheared to the target size range using Bioruptor® XL (Diagenode, USA) and converted into an  
81 Illumina-compatible sequencing library using the NEBNext E6070 kit (New England Biolabs, UK). The  
82 libraries were PCR amplified with index primers and purified using Qiaquick columns (Qiagen, Hilden,  
83 Germany) according to the manufacturer's instruction ([Additional file 1b](#)). Multiple libraries were combined  
84 together into three pools, normalized to 10 nM and sequenced across three lanes of Illumina HiSeq 2500

1  
2  
3  
4 85 using SR100bp chemistry. In Berlin and Goettingen, mitogenomes were generated by author PRP and  
5  
6 86 CR using overlapping PCR products using long range PCR ([Additional file 1c](#)) followed by library  
7  
8 87 construction and MiSeq sequencing, or Sanger sequencing as described in [2] and [1, 3, 4], respectively.  
9  
10 88 Author RM's mitogenomes were done using methods outlined in [5].  
11  
12 89  
13  
14 90 Raw reads for FMS samples were assembled independently by authors FMS and FP using two different  
15  
16 91 approaches, then compared for consistency. Author FMS trimmed the reads for sequencing adapters, low  
17  
18 92 quality stretches and leading/tailing Ns using AdapterRemoval 1.2 [6]. The mitochondrial genome was  
19  
20 93 reconstructed with MITObim v1.8 [7] using the reference mitogenome of the closest species available in  
21  
22 94 GenBank as the seed reference ([Additional file 2](#)). In order to obtain the mapping statistics of the  
23  
24 95 samples, we ran PALEOMIX v 1.2.6 [8] with default parameters where reads shorter than 25 bp after  
25  
26 96 trimming were discarded. The trimmed reads were aligned against the newly assembled mitogenome  
27  
28 97 generated by MITObim using Burrows–Wheeler Aligner (BWA) [9]. Alignments showing low-quality scores  
29  
30 98 and PCR duplicates were further removed using the MarkDuplicates program from Picard tools, and  
31  
32 99 reads were locally realigned around small insertions and deletions (indels) to improve overall genome  
33  
34 100 quality using the IndelRealigner tool from the Genome Analysis Toolkit (GATK)[10]. In contrast, author  
35  
36 101 FP inputted the trimmed reads into mitoMaker (<https://sourceforge.net/projects/mitomaker/>), which  
37  
38 102 performs a de-novo and reference-based assembly using SOAPdenovoTrans v1.03 [11] and MITObim  
39  
40 103 v1.7 [7]. Post assembly, the FMS and FP mitogenomes were manually compared for consistency by FMS  
41  
42 104 to generate the final consensus sequences. These assemblies were automatically annotated using  
43  
44 105 tRNAscan-SE v1.4 [12] and BLAST v2.2.29 [13] using the mitochondrial genomes found in the NCBI  
45  
46 106 RefSeq (<https://www.ncbi.nlm.nih.gov/refseq/>) as references.  
47  
48  
49 107  
50  
51 108 For mitogenome constructed by author RM, Illumina sequence reads were de-multiplexed according to  
52  
53 109 the respective indexes with the Illumina software bcl2fastq v2.17 (Illumina, San Diego, CA, USA) and  
54  
55 110 adapters were clipped from the sequence reads with the software cutadapt v1.3 [14]. Quality trimming  
56  
57 111 was done through a sliding window approach (10 bp; Q20) and all reads shorter than 20 bp were  
58  
59 112 removed from the analyses. Mitogenome references from target or closely related species were used for  
60  
61  
62  
63  
64  
65

1  
2  
3  
4 113 mapping of the sequencing reads. Aligned reads were de-duplicated using MarkDuplicates from Picard-  
5  
6 114 tools v1.106 (<https://github.com/broadinstitute/picard>). VariantCalling was carried out using Samtools v1.1  
7  
8  
9 115 [9] and Bcftools v1.2 (<http://github.com/samtools/bcftools>). For each sample, GATK [10] Variant Calling  
10  
11  
12 116 output files were further filtered to have a minimum read coverage  $\geq 3x$ , and variants were only called  
13  
14  
15 117 when the corresponding base was represented by  $\geq 50\%$ , otherwise this position was "N"-masked.

16  
17 118  
18  
19  
20 119 Numbers of raw reads generated for each samples and mapping statistics for all 75 mitogenome  
21  
22 120 assemblies are shown in [Additional file 2](#). Sanger sequenced mitogenomes were checked with 4Peaks  
23  
24 121 1.8 ([www.nucleobytes.com](http://www.nucleobytes.com)), assembled with SeaView 4.5.4 [15] and annotated with DOGMA [16]. All  
25  
26 122 mitogenomes were checked manually by eye to identify possible errors caused by insertion and deletions.  
27  
28 123 The final mitochondrial genomes have been uploaded to GenBank (accession numbers are provided in  
29  
30 124 Table 1 and Table 2). The details of all new mitogenomes assembled in this work are given in Table 1  
31  
32 125 and Table 2. Mitogenomes (62 samples) with known localities were geotagged and mapped to display its  
33  
34 126 geographical distribution (Figure 1).

35  
36 127  
37  
38 128 **Phylogenetic analysis**  
39  
40 129 All the sequenced mitogenomes were aligned using MAFFT v7.158b [17], using the E-INS-i option  
41  
42 130 ([Additional file 3](#)). RAxML v8.0.26 [18] was used to perform the phylogenetic analysis with a  
43  
44 131 GTR+GAMMA model of nucleotide substitution. To obtain node support, we used 100 bootstrap pseudo-  
45  
46 132 replicates (Figure 2). The newick file is provided as [Additional file 4](#).

47  
48 133  
49  
50 134 **Availability of supporting data**  
51  
52 135 Raw shotgun data are deposited in the SRA under bioproject number PRJNA361218 and is available in the  
53  
54 136 GigaScience repository, GigaDB <ftp://user27:SallehFaezah@climb.genomics.cn>.

55  
56  
57 137  
58  
59 138

1  
2  
3  
4  
5  
6  
7  
8  
9  
10  
11  
12  
13  
14  
15  
16  
17  
18  
19  
20  
21  
22  
23  
24  
25  
26  
27  
28  
29  
30  
31  
32  
33  
34  
35  
36  
37  
38  
39  
40  
41  
42  
43  
44  
45  
46  
47  
48  
49  
50  
51  
52  
53  
54  
55  
56  
57  
58  
59  
60  
61  
62  
63  
64  
65

139

**140 Abbreviations**

141 SE: South East; eDNA: environmental deoxyribonucleic acid; bp: basepair; PCR: polymerase chain  
142 reaction; BWA: Burrows–Wheeler Aligner; GATK: Genome Analysis Toolkit; BLAST: Basic Local  
143 Alignment Search Tool; NCBI RefSeq: National Center for Biotechnology Information Reference  
144 Sequence Database; MAFFT: Multiple Alignment using Fast Fourier Transform ; RAxML: Randomized  
145 Axelerated Maximum Likelihood.

146

147

**148 Acknowledgements**

149 This project was funded by the Malaysian Government, Lundbeck Foundation (R52-5062), Leibniz-  
150 Association grant SAW-2013-IZW-2, the German Federal Ministry of Education and Research grant  
151 BMBF FKZ: 01LN1301A and the German Primate Center. We thank the Danish National High-throughput  
152 Sequencing Centre for assistance in generating Illumina data. We thank the staff of the zoos in Hannover,  
153 Copenhagen, Gettorf, Belfast, Bristol, Howletts Wild Animal Park, the staff of the Ludwig-Maximilians-  
154 University Munich, the Bavarian State Collection Munich, the National Museums Scotland, Edinburgh, the  
155 Natural History Museum Berlin, Naturalis Leiden, and the Zoological Museum, Natural History Museum of  
156 Denmark, University of Copenhagen for providing samples for this work.

157

**158 Authors' contributions**

159 FMS, AW, and MTPG conceived the project. FMS, MHSS, MSS, MSA, RM, PRP, CR, BKL, and SJR  
160 collected the samples and extracted the genomic DNA. FMS, RM, PRP and CR constructed the libraries  
161 and did sequencing. FMS, JRM, FP, SL, PRP, RM, DL and CR assembled the mitogenomes and  
162 performed mitogenome analysis. FMS, SL, PRP and MTPG wrote the article. All authors discussed the  
163 project and data. All authors read and approved the final manuscript.

164

**165 Competing interests**

166 The authors declare that they have no competing interests.

1  
2  
3  
4  
5  
6  
7  
8  
9  
10  
11  
12  
13  
14  
15  
16  
17  
18  
19  
20  
21  
22  
23  
24  
25  
26  
27  
28  
29  
30  
31  
32  
33  
34  
35  
36  
37  
38  
39  
40  
41  
42  
43  
44  
45  
46  
47  
48  
49  
50  
51  
52  
53  
54  
55  
56  
57  
58  
59  
60  
61  
62  
63  
64  
65

167  
168  
169  
170  
171  
172  
173  
174  
175  
176  
177  
178  
179  
180  
181  
182  
183  
184  
185  
186  
187  
188  
189  
190  
191  
192  
193

**Author details**

<sup>1</sup>Centre for GeoGenetics, Natural History Museum of Denmark, University of Copenhagen, Øster Voldgade 5-7, 1350, Copenhagen, Denmark. <sup>2</sup>Faculty of Biosciences and Medical Engineering, Universiti Teknologi Malaysia, 81310 Johor Bahru, Johor, Malaysia. <sup>3</sup>Leibniz Institute for Zoo and Wildlife Research, Alfred-Kowalke Strasse 17, 10315 Berlin, Germany. <sup>4</sup>Undergraduate Program on Genomic Sciences, Universidad Nacional Autonoma de Mexico, 62210 Cuernavaca, Mexico. <sup>5</sup>BGI-Shenzhen, Shenzhen, Guangdong, China. <sup>6</sup>Natural History Museum, University of Oslo, P.O. Box 1172 Blindern, NO-0318, Oslo, Norway. <sup>7</sup>Freie Universität Berlin, Kaiserswerther Str. 16-18, 14195 Berlin, Germany. <sup>8</sup>Gene Bank of Primates and Primate Genetics Laboratory, German Primate Center, Leibniz Institute for Primate Research, Kellnerweg 4, 37077, Göttingen, Germany. <sup>9</sup>Forest Biodiversity Division, Forest Research Institute Malaysia, 52109 Kepong, Selangor, Malaysia. <sup>10</sup>Department of Natural History, Royal Ontario Museum, Toronto, Canada. <sup>11</sup>School of Biological and Chemical Sciences, Queen Mary University of London, Mile End Road, London E1 4NS, UK. <sup>12</sup>NTNU University Museum, Norwegian University of Science and Technology, Trondheim, Norway.

1  
2  
3  
4 194  
5  
6 195  
7  
8 196  
9  
10  
11 197  
12  
13 198  
14  
15  
16 199  
17 200  
18  
19 201  
20 202  
21 203  
22  
23 204  
24 205  
25  
26 206  
27 207  
28  
29 208  
30 209  
31  
32 210  
33 211  
34  
35 212  
36 213  
37 214  
38  
39 215  
40 216  
41 217  
42  
43 218  
44 219  
45  
46 220  
47 221  
48  
49 222  
50 223  
51  
52 224  
53 225  
54  
55 226  
56 227  
57  
58 228  
59 229  
60  
61 230  
62  
63  
64  
65

**References**

1. Liedigk R, Kolleck J, Böker KO, et al (2015) Mitogenomic phylogeny of the common long-tailed macaque (*Macaca fascicularis fascicularis*). *BMC Genomics* 16:222
2. Patel RP, Förster DW, Kitchener AC, et al (2016) Two species of Southeast Asian cats in the genus *Catopuma* with diverging histories: an island endemic forest specialist and a widespread habitat generalist. *Open Science* 3:160350
3. Roos C, Zinner D, Kubatko LS, et al (2011) Nuclear versus mitochondrial DNA: evidence for hybridization in colobine monkeys. *BMC Evol Biol* 11:77
4. Liedigk R, Roos C, Brameier M, Zinner D (2014) Mitogenomics of the Old World monkey tribe Papionini. *BMC Evol Biol* 14:176
5. Fortes GG, Paijmans JLA (2015) Analysis of Whole Mitogenomes from Ancient Samples. *Methods Mol Biol* 1347:179–195
6. Lindgreen S (2012) AdapterRemoval: easy cleaning of next-generation sequencing reads. *BMC Res Notes* 5:337
7. Hahn C, Bachmann L, Chevreux B (2013) Reconstructing mitochondrial genomes directly from genomic next-generation sequencing reads—a baiting and iterative mapping approach. *Nucleic Acids Res.*
8. Schubert M, Ermini L, Der Sarkissian C, et al (2014) Characterization of ancient and modern genomes by SNP detection and phylogenomic and metagenomic analysis using PALEOMIX. *Nat Protoc* 9:1056–1082
9. Li H, Durbin R (2009) Fast and accurate short read alignment with Burrows–Wheeler transform. *Bioinformatics* 25:1754–1760
10. McKenna A, Hanna M, Banks E, et al (2010) The Genome Analysis Toolkit: a MapReduce framework for analyzing next-generation DNA sequencing data. *Genome Res* 20:1297–1303
11. Xie Y, Wu G, Tang J, et al (2014) SOAPdenovo-Trans: de novo transcriptome assembly with short RNA-Seq reads. *Bioinformatics* 30:1660–1666
12. Lowe TM, Eddy SR (1997) tRNAscan-SE: a program for improved detection of transfer RNA genes in genomic sequence. *Nucleic Acids Res* 25:955–964
13. Camacho C, Coulouris G, Avagyan V, Ma N, Papadopoulos J, Bealer K, Madden TL (2009) BLAST+: architecture and applications. *BMC Bioinformatics* 10:421
14. Martin M (2011) Cutadapt removes adapter sequences from high-throughput sequencing reads. *EMBnet.journal* 17:10–12
15. Gouy M, Guindon S, Gascuel O (2010) SeaView version 4: A multiplatform graphical user interface



1  
2  
3  
4 231 for sequence alignment and phylogenetic tree building. *Mol Biol Evol* 27:221–224  
5  
6 232 16. Wyman SK, Jansen RK, Boore JL (2004) Automatic annotation of organellar genomes with DOGMA.  
7 233 *Bioinformatics* 20:3252–3255  
8  
9 234 17. Katoh K, Standley DM (2013) MAFFT multiple sequence alignment software version 7: improvements  
10 235 in performance and usability. *Mol Biol Evol* 30:772–780  
11  
12 236 18. Stamatakis A (2014) RAxML version 8: a tool for phylogenetic analysis and post-analysis of large  
13 237 phylogenies. *Bioinformatics* 30:1312–1313  
14

15 238  
16  
17 239  
18  
19 240  
20  
21 241  
22  
23 242  
24

25  
26 243 **Tables and Figures**

- 27  
28 244 1. Table 1: List of mitogenomes assembled in this work that supplement pre-existing mitogenome  
29 references already available in GenBank  
30 245  
31  
32 246 2. Table 2: List of mitogenomes assembled in this work that currently have no complete  
33 mitogenome reference available in GenBank  
34 247  
35  
36 248 3. Figure 1: Geographical distribution of mitogenomes assembled in this work (62 mitogenomes with  
37 known locality)  
38 249  
39  
40 250 4. Figure 2: Phylogenetic tree of mitogenomes assembled in this work  
41

42 251  
43  
44 252  
45

46 253 **Additional files**

- 47  
48 254 1. Additional file 1: DNA extraction of historical samples, library construction and primer information  
49  
50 255 2. Additional file 2: Sample information sheet of mitogenomes assembled in this work  
51  
52 256 3. Additional file 3: Alignment of mitogenomes assembled in this work  
53  
54 257 4. Additional file 4: Newick file for phylogenetic tree of mitogenomes assembled in this work  
55  
56

57 258  
58  
59 259  
60

61  
62  
63  
64  
65

**Table 1: List of mitogenomes assembled in this work that supplement pre-existing mitogenome references already available in GenBank**

| No | GenBank ID | Common name                          | Genus               | Species            | Assembly Size | Locality                   | Source                                                    | Sample date of collection | Data by |
|----|------------|--------------------------------------|---------------------|--------------------|---------------|----------------------------|-----------------------------------------------------------|---------------------------|---------|
| 1  | KY117537   | <i>Hog deer</i>                      | <i>Axis</i>         | <i>porcinus</i>    | 16402         | CPH Zoo                    | ZM, KU                                                    | 21/8/1912                 | FMS/FP  |
| 2  | KY117538   | <i>Pallas's squirrel</i>             | <i>Callosciurus</i> | <i>erythraeus</i>  | 16656         | Bangkok, Thailand          | ZM, KU                                                    | 25/5/1969                 | FMS/FP  |
| 3  | KX265095   | <i>Bay Cat</i>                       | <i>Catopuma</i>     | <i>badia</i>       | 16,960        | Sabah, Malaysia            | National Museums Scotland                                 | 20/04/2000                | PRP     |
| 4  | KX224524   | <i>Asiatic Golden Cat</i>            | <i>Catopuma</i>     | <i>temminckii</i>  | 16,960        | Thailand                   | American Museum of National History, New York.            | 10/10/1927                | PRP     |
| 5  | KY117545   | <i>Sumatran Rhino</i>                | <i>Dicerorhinus</i> | <i>sumatrensis</i> | 16466         | Sumatra                    | Naturalis, Leiden, The Netherlands                        | 1880                      | RM      |
| 6  | KY117546   | <i>Least pygmy squirrel</i>          | <i>Exilisciurus</i> | <i>exilis</i>      | 16637         | Indonesia                  | ROM                                                       | 16/06/1993                | FMS/FP  |
| 7  | KY117548   | <i>Hose's mongoose</i>               | <i>Herpestes</i>    | <i>javanicus</i>   | 16340         | Java, Indonesia            | ZM, KU                                                    | 12/3/1947                 | FMS/FP  |
| 8  | KY117550   | <i>Three-striped ground Squirrel</i> | <i>Lariscus</i>     | <i>indsignis</i>   | 16399         | Maybe Malaysia             | ZM, KU                                                    | unknown                   | FMS/FP  |
| 9  | KY117592   | <i>Black Crested Macaque</i>         | <i>Macaca</i>       | <i>nigra</i>       | 16558         | captive                    | Gettorf Zoo, Germany                                      | 18/07/2000                | CR      |
| 10 | KY117593   | <i>Northern Pig-tailed Macaque</i>   | <i>Macaca</i>       | <i>leonina</i>     | 16554         | captive                    | Ludwig-Maximilians-University Munich, Germany             | 6/3/1995                  | CR      |
| 11 | KY117594   | <i>Southern pig-tailed macaque</i>   | <i>Macaca</i>       | <i>nemestrina</i>  | 16531         | West Malaysia              | National Museums Scotland, Edinburgh, UK                  | unknown                   | CR      |
| 12 | KY117561   | <i>Reeves's/Chinese Muntjak</i>      | <i>Muntiacus</i>    | <i>reevesi</i>     | 16354         | Shin-Yi, Taiwan            | Naturalis, Leiden, The Netherlands                        | 1968                      | RM      |
| 13 | KT288227   | <i>Marbled Cat</i>                   | <i>Pardofelis</i>   | <i>marmorata</i>   | 17,218        | Sumatra                    | National archaeological museum of the Netherlands, Leiden | 30/08/1930                | PRP     |
| 14 | KY117602   | <i>Sumatra Surili</i>                | <i>Presbytis</i>    | <i>melalophos</i>  | 16,558        | captive                    | Howletts Wild Animal Park, UK                             | 23/7/1999                 | CR      |
| 15 | KR135743   | <i>Flat-headed Cat</i>               | <i>Prionailurus</i> | <i>planiceps</i>   | 17,074        | Sabah, Malaysia            | Sabah wildlife department                                 | 25/04/2000                | PRP     |
| 16 | KY117580   | <i>Malayan Field Rat</i>             | <i>Rattus</i>       | <i>tiomanicus</i>  | 16415         | SPF Bidor, Perak, Malaysia | FRIM                                                      | 12/2/2011                 | FMS/FP  |
| 17 | KY117579   | <i>Malayan Field Rat</i>             | <i>Rattus</i>       | <i>tiomanicus</i>  | 16312         | Indonesia                  | ROM                                                       | 01/06/1993                | FMS/FP  |

|    |          |                                    |                       |                           |       |                                            |                                           |           |        |
|----|----------|------------------------------------|-----------------------|---------------------------|-------|--------------------------------------------|-------------------------------------------|-----------|--------|
| 18 | KY117581 | <i>Malayan Field Rat</i>           | <i>Rattus</i>         | <i>tiomanicus</i>         | 16305 | Hutan Simpan Chikus, Tapah Perak, Malaysia | FRIM                                      | 13/1/2011 | FMS/FP |
| 19 | KY117582 | <i>Black Giant Squirrel</i>        | <i>Ratufa</i>         | <i>bicolor peninsulae</i> | 16600 | Bang Nara, Malakka, Thailand               | ZM, KU                                    | 3/12/1932 | FMS/FP |
| 20 | KY117574 | <i>Javan Rhino</i>                 | <i>Rhinoceros</i>     | <i>sondaicus</i>          | 16417 | Java                                       | Copenhagen Natural History Museum         | unknown   | RM     |
| 21 | KY117575 | <i>Javan Rusa</i>                  | <i>Rusa</i>           | <i>timorensis</i>         | 16437 | Toeloeng Agoeng, West Java                 | Naturalis, Leiden, The Netherlands        | unknown   | RM     |
| 22 | KY117576 | <i>Indian Sambar Deer</i>          | <i>Rusa</i>           | <i>unicolor dejeani</i>   | 16437 | Mentawai, Indonesia                        | Naturalis, Leiden, The Netherlands        | unknown   | RM     |
| 23 | KY117599 | <i>Western Purple-faced Langur</i> | <i>Semnopithecus</i>  | <i>vetulus</i>            | 16545 | captive                                    | Belfast Zoo, UK                           | 9/11/1998 | CR     |
| 24 | KY117589 | <i>Malayan Tapir</i>               | <i>Tapirus</i>        | <i>indicus</i>            | 16794 | captive                                    | Copenhagen Zoo                            | 11/1/2015 | FMS/FP |
| 25 | KY117598 | <i>Silvered Langur</i>             | <i>Trachypithecus</i> | <i>cristatus</i>          | 16551 | North Sumatra                              | Bavarian State Collection Munich, Germany | 1911      | CR     |

---

ZM, KU: Zoological Musuem, University of Copenhagen; ROM: Royal Ontario Museum; FRIM: Forest Research Institute, Malaysia

**Table 2: List of mitogenomes assembled in this work that currently have no complete mitogenome reference available in GenBank**

| No | GenBank ID | Common name                     | Genus               | Species                      | Assembly Size | Locality                                       | Source                                                     | Sample date of collection | Data by |
|----|------------|---------------------------------|---------------------|------------------------------|---------------|------------------------------------------------|------------------------------------------------------------|---------------------------|---------|
| 1  | KY117536   | <i>Asian Small-clawed Otter</i> | <i>Aonyx</i>        | <i>cinereus</i>              | 16153         | captive                                        | Copenhagen Zoo                                             | 08/08/11                  | FMS/FP  |
| 2  | KY117535   | <i>Asian Small-clawed Otter</i> | <i>Aonyx</i>        | <i>cinereus</i>              | 16153         | Sarawak, Malaysia                              | British Musuem of Natural History, London Tierpark, Berlin | 25/8/2010                 | FMS/FP  |
| 3  | KY117560   | <i>Binturong</i>                | <i>Arctictis</i>    | <i>binturong</i>             | 17,067        | unknown                                        |                                                            | 29/11/2010                | PRP     |
| 4  | KY117541   | <i>Plantain Squirrel</i>        | <i>Callosciurus</i> | <i>notatus</i>               | 16582         | Hutan Bidor, Perak, Malaysia                   | FRIM                                                       | 11/2/2011                 | FMS/FP  |
| 5  | KY117542   | <i>Plantain squirrel</i>        | <i>Callosciurus</i> | <i>notatus</i>               | 16599         | East Kalimantan, Indonesia                     | ROM                                                        | 03/06/1993                | FMS/FP  |
| 6  | KY117543   | <i>Prevost's squirrel</i>       | <i>Callosciurus</i> | <i>prevostii</i>             | 16674         | East Kalimantan, Indonesia                     | ROM                                                        | 15/06/1993                | FMS/FP  |
| 7  | KY117540   | <i>Variable squirrel</i>        | <i>Callosciurus</i> | <i>finlaysonii frandseni</i> | 15747         | Koh Chang                                      | ZM, KU                                                     | 14/1/1900                 | FMS/FP  |
| 8  | KY117539   | <i>Variable squirrel</i>        | <i>Callosciurus</i> | <i>finlaysonii</i>           | 16489         | Central Siam                                   | ZM, KU                                                     | 2/2/1928                  | FMS/FP  |
| 9  | KY117544   | <i>Sunda Otter Civet</i>        | <i>Cynogale</i>     | <i>bennetti</i>              | 15784         | Borneo                                         | British Musuem of Natural History, London                  | 25/8/2010                 | FMS/FP  |
| 10 | KY117547   | <i>Hose's mongoose</i>          | <i>Herpestes</i>    | <i>hosei</i>                 | 16819         | Ceylon                                         | ZM, KU                                                     | 1/7/1931                  | FMS/FP  |
| 11 | KY117549   | <i>Thick-spined porcupine</i>   | <i>Hystrix</i>      | <i>crassipinis</i>           | 15778         | CPH Zoo                                        | ZM, KU                                                     | 19/1/1874                 | FMS/FP  |
| 12 | KY117552   | <i>Long-tailed Giant Rat</i>    | <i>Leopoldamys</i>  | <i>sabanus</i>               | 15973         | G. Telapak Buruk, Negeri Sembilan, Malaysia    | FRIM                                                       | 24/2/2010                 | FMS/FP  |
| 13 | KY117553   | <i>Long-tailed Giant Rat</i>    | <i>Leopoldamys</i>  | <i>sabanus</i>               | 15972         | Teluk Segadas, P. Pangkor, Perak, Malaysia     | FRIM                                                       | 19/3/2010                 | FMS/FP  |
| 14 | KY117554   | <i>Long-tailed Giant Rat</i>    | <i>Leopoldamys</i>  | <i>sabanus</i>               | 15974         | Hutan Simpan Temengor, Gerik Perak, Malaysia   | FRIM                                                       | 23/1/2014                 | FMS/FP  |
| 15 | KY117555   | <i>Long-tailed Giant Rat</i>    | <i>Leopoldamys</i>  | <i>sabanus</i>               | 15972         | Hutan Simpan Lenggong, Kluang, Johor, Malaysia | FRIM                                                       | 19/2/2014                 | FMS/FP  |
| 16 | KY117551   | <i>Long-tailed giant rat</i>    | <i>Leopoldamys</i>  | <i>sabanus</i>               | 15974         | Malaysia                                       | ROM                                                        | 28/05/1993                | FMS/FP  |
| 17 | KY117556   | <i>Hairy-nosed otter</i>        | <i>Lutra</i>        | <i>sumatrana</i>             | 16580         | Bang Nara, Thailand                            | ZM, KU                                                     | 1/4/1939                  | FMS/FP  |

|    |          |                               |                   |                      |       |                                                 |                                           |            |        |
|----|----------|-------------------------------|-------------------|----------------------|-------|-------------------------------------------------|-------------------------------------------|------------|--------|
| 18 | KY117557 | <i>Smooth-coated otter</i>    | <i>Lutrogale</i>  | <i>perspicillata</i> | 16042 | Malacca, Malaysia                               | British Museum of Natural History, London | 25/8/2010  | FMS/FP |
| 19 | KY117558 | <i>Smooth-coated otter</i>    | <i>Lutrogale</i>  | <i>perspicillata</i> | 16041 | Bang Nara, Thailand                             | ZM, KU                                    | 24/1/1933  | FMS/FP |
| 20 | KY117591 | <i>Moor macaque</i>           | <i>Macaca</i>     | <i>maura</i>         | 16563 | captive                                         | Hannover Zoo, Germany                     | 20/8/1998  | CR     |
| 21 | KY117564 | <i>Rajah/Brown Spiny Rat</i>  | <i>Maxomys</i>    | <i>rajah</i>         | 16200 | Indonesia                                       | ROM                                       | 06/06/1993 | FMS/FP |
| 22 | KY117562 | <i>Rajah/Brown Spiny Rat</i>  | <i>Maxomys</i>    | <i>rajah</i>         | 16296 | Teluk Segadas, P. Pangkor, Perak, Malaysia      | FRIM                                      | 19/3/2010  | FMS/FP |
| 23 | KY117563 | <i>Rajah/Brown Spiny Rat</i>  | <i>Maxomys</i>    | <i>rajah</i>         | 16296 | Pasir Bogak, P. Pangkor, Perak, Malaysia        | FRIM                                      | 18/3/2010  | FMS/FP |
| 24 | KY117567 | <i>Red Spiny Rat</i>          | <i>Maxomys</i>    | <i>surifer</i>       | 16286 | 50 ha, Pasoh, Negeri Sembilan, Malaysia         | FRIM                                      | 12/6/2008  | FMS/FP |
| 25 | KY117566 | <i>Red Spiny Rat</i>          | <i>Maxomys</i>    | <i>surifer</i>       | 16290 | Indonesia                                       | ROM                                       | 21/05/1993 | FMS/FP |
| 26 | KY117565 | <i>Red Spiny Rat</i>          | <i>Maxomys</i>    | <i>surifer</i>       | 16286 | Malaysia                                        | ROM                                       | 17/05/2013 | FMS/FP |
| 27 | KY117570 | <i>Whitehead's Spiny Rat</i>  | <i>Maxomys</i>    | <i>whiteheadi</i>    | 16316 | Hutan Simpan Bikam, Perak, Malaysia             | FRIM                                      | 12/2/2011  | FMS/FP |
| 28 | KY117571 | <i>Whitehead's Spiny Rat</i>  | <i>Maxomys</i>    | <i>whiteheadi</i>    | 16316 | Keruing Trail, FRIM, Kepong, Selangor, Malaysia | FRIM                                      | 13/3/2013  | FMS/FP |
| 29 | KY117568 | <i>Whitehead's Spiny Rat</i>  | <i>Maxomys</i>    | <i>whiteheadi</i>    | 16287 | Hutan Simpan Bikam, Perak, Malaysia             | FRIM                                      | 12/2/2011  | FMS/FP |
| 30 | KY117569 | <i>Whitehead's Spiny Rat</i>  | <i>Maxomys</i>    | <i>whiteheadi</i>    | 16429 | Bukit Tapah, Perak, Malaysia                    | FRIM                                      | 23/3/2011  | FMS/FP |
| 31 | KY052142 | <i>Indian muntjac</i>         | <i>Muntiacus</i>  | <i>muntjak</i>       | 16354 | West Java                                       | Vienna NHM                                | 1858       | RM     |
| 32 | KY117559 | <i>Bornean yellow muntjac</i> | <i>Muntiacus</i>  | <i>atherodes</i>     | 16354 | Koemai, West Borneo                             | Bonn NHM                                  | 1938       | RM     |
| 33 | KY052092 | <i>Indian Red Muntjac</i>     | <i>Muntiacus</i>  | <i>vaginalis</i>     | 16354 | Gangtok, South Sikkim, India                    | Berlin NHM                                | unknown    | RM     |
| 34 | KY117573 | <i>Dark-tailed Tree Rat</i>   | <i>Niviventer</i> | <i>cremoriventer</i> | 16322 | Track 5 (G.Inas), Kedah, Malaysia               | FRIM                                      | 5/11/2009  | FMS/FP |
| 35 | KY117572 | <i>Dark-tailed tree rat</i>   | <i>Niviventer</i> | <i>cremoriventer</i> | 16234 | Malaysia                                        | ROM                                       | 17/05/2013 | FMS/FP |

|    |          |                                 |                       |                        |        |                                     |                                               |            |        |
|----|----------|---------------------------------|-----------------------|------------------------|--------|-------------------------------------|-----------------------------------------------|------------|--------|
| 36 | KY117600 | <i>Grizzled Leaf Monkey</i>     | <i>Presbytis</i>      | <i>comata comata</i>   | 16551  | captive                             | Howletts Wild Animal Park, UK                 | 23/12/1999 | CR     |
| 37 | KY117601 | <i>Mitred Leaf Monkey</i>       | <i>Presbytis</i>      | <i>mitrata</i>         | 16,555 | captive                             | Howletts Wild Animal Park, UK                 | 12/11/1998 | CR     |
| 38 | KX857784 | <i>Leopard cat</i>              | <i>Prionailurus</i>   | <i>bengalensis</i>     | 16,989 | Thailand                            | American Museum of Natural History, New York. | 25/02/1924 | PRP    |
| 39 | KY117578 | <i>Annandale's Sundaic Rat</i>  | <i>Rattus</i>         | <i>annandalei</i>      | 16297  | Hutan Simpan Bikam, Perak, Malaysia | FRIM                                          | 12/2/2011  | FMS/FP |
| 40 | KY117577 | <i>Annandale's Sundaic Rat</i>  | <i>Rattus</i>         | <i>annandalei</i>      | 16301  | Hutan Simpan Bikam, Perak, Malaysia | FRIM                                          | 11/2/2011  | FMS/FP |
| 41 | KY117583 | <i>Mountain giant Sunda rat</i> | <i>Sundamys</i>       | <i>infraluteus</i>     | 16297  | Malaysia                            | ROM                                           | 18/05/2013 | FMS/FP |
| 42 | KY117585 | <i>Müller's Giant Sunda Rat</i> | <i>Sundamys</i>       | <i>meulleri</i>        | 16326  | Track 1 (G.Inas), Kedah, Malaysia   | FRIM                                          | 5/11/2009  | FMS/FP |
| 43 | KY117584 | <i>Müller's giant Sunda rat</i> | <i>Sundamys</i>       | <i>meulleri</i>        | 16304  | Malaysia                            | ROM                                           | 01/06/2013 | FMS/FP |
| 44 | KY117586 | <i>Brooke's squirrel</i>        | <i>Sundasciurus</i>   | <i>brookei</i>         | 16417  | East Kalimantan, Indonesia          | ROM                                           | 13/06/1993 | FMS/FP |
| 45 | KY117587 | <i>Low's squirrel</i>           | <i>Sundasciurus</i>   | <i>lowii</i>           | 16307  | East Kalimantan, Indonesia          | ROM                                           | 06/06/1993 | FMS/FP |
| 46 | KY117588 | <i>name pending</i>             | <i>Sundasciurus</i>   | <i>sp</i>              | 16458  | East Kalimantan, Indonesia          | ROM                                           | 21/06/1993 | FMS/FP |
| 47 | KY117595 | <i>Phayre's Langur</i>          | <i>Trachypithecus</i> | <i>phayrei phayrei</i> | 16548  | South West Myanmar                  | Natural History Museum Berlin, Germany        | unknown    | CR     |
| 48 | KY117596 | <i>East Javan Ebony Langur</i>  | <i>Trachypithecus</i> | <i>auratus</i>         | 16552  | captive                             | Bristol Zoo, UK                               | 26/10/2010 | CR     |
| 49 | KY117597 | <i>West Javan Ebony Langur</i>  | <i>Trachypithecus</i> | <i>mauritus</i>        | 16554  | West Java                           | Naturalis Leiden; Netherlands                 | unknown    | CR     |
| 50 | KY117590 | <i>Long-tailed porcupine</i>    | <i>Trichys</i>        | <i>fasciculata</i>     | 16328  | Borneo                              | ZM, KU                                        | 5/10/1894  | FMS/FP |

ZM, KU: Zoological Museum, University of Copenhagen; ROM: Royal Ontario Museum; FRIM: Forest Research Institute, Malaysia; NHM: Natural History







/ Musuem

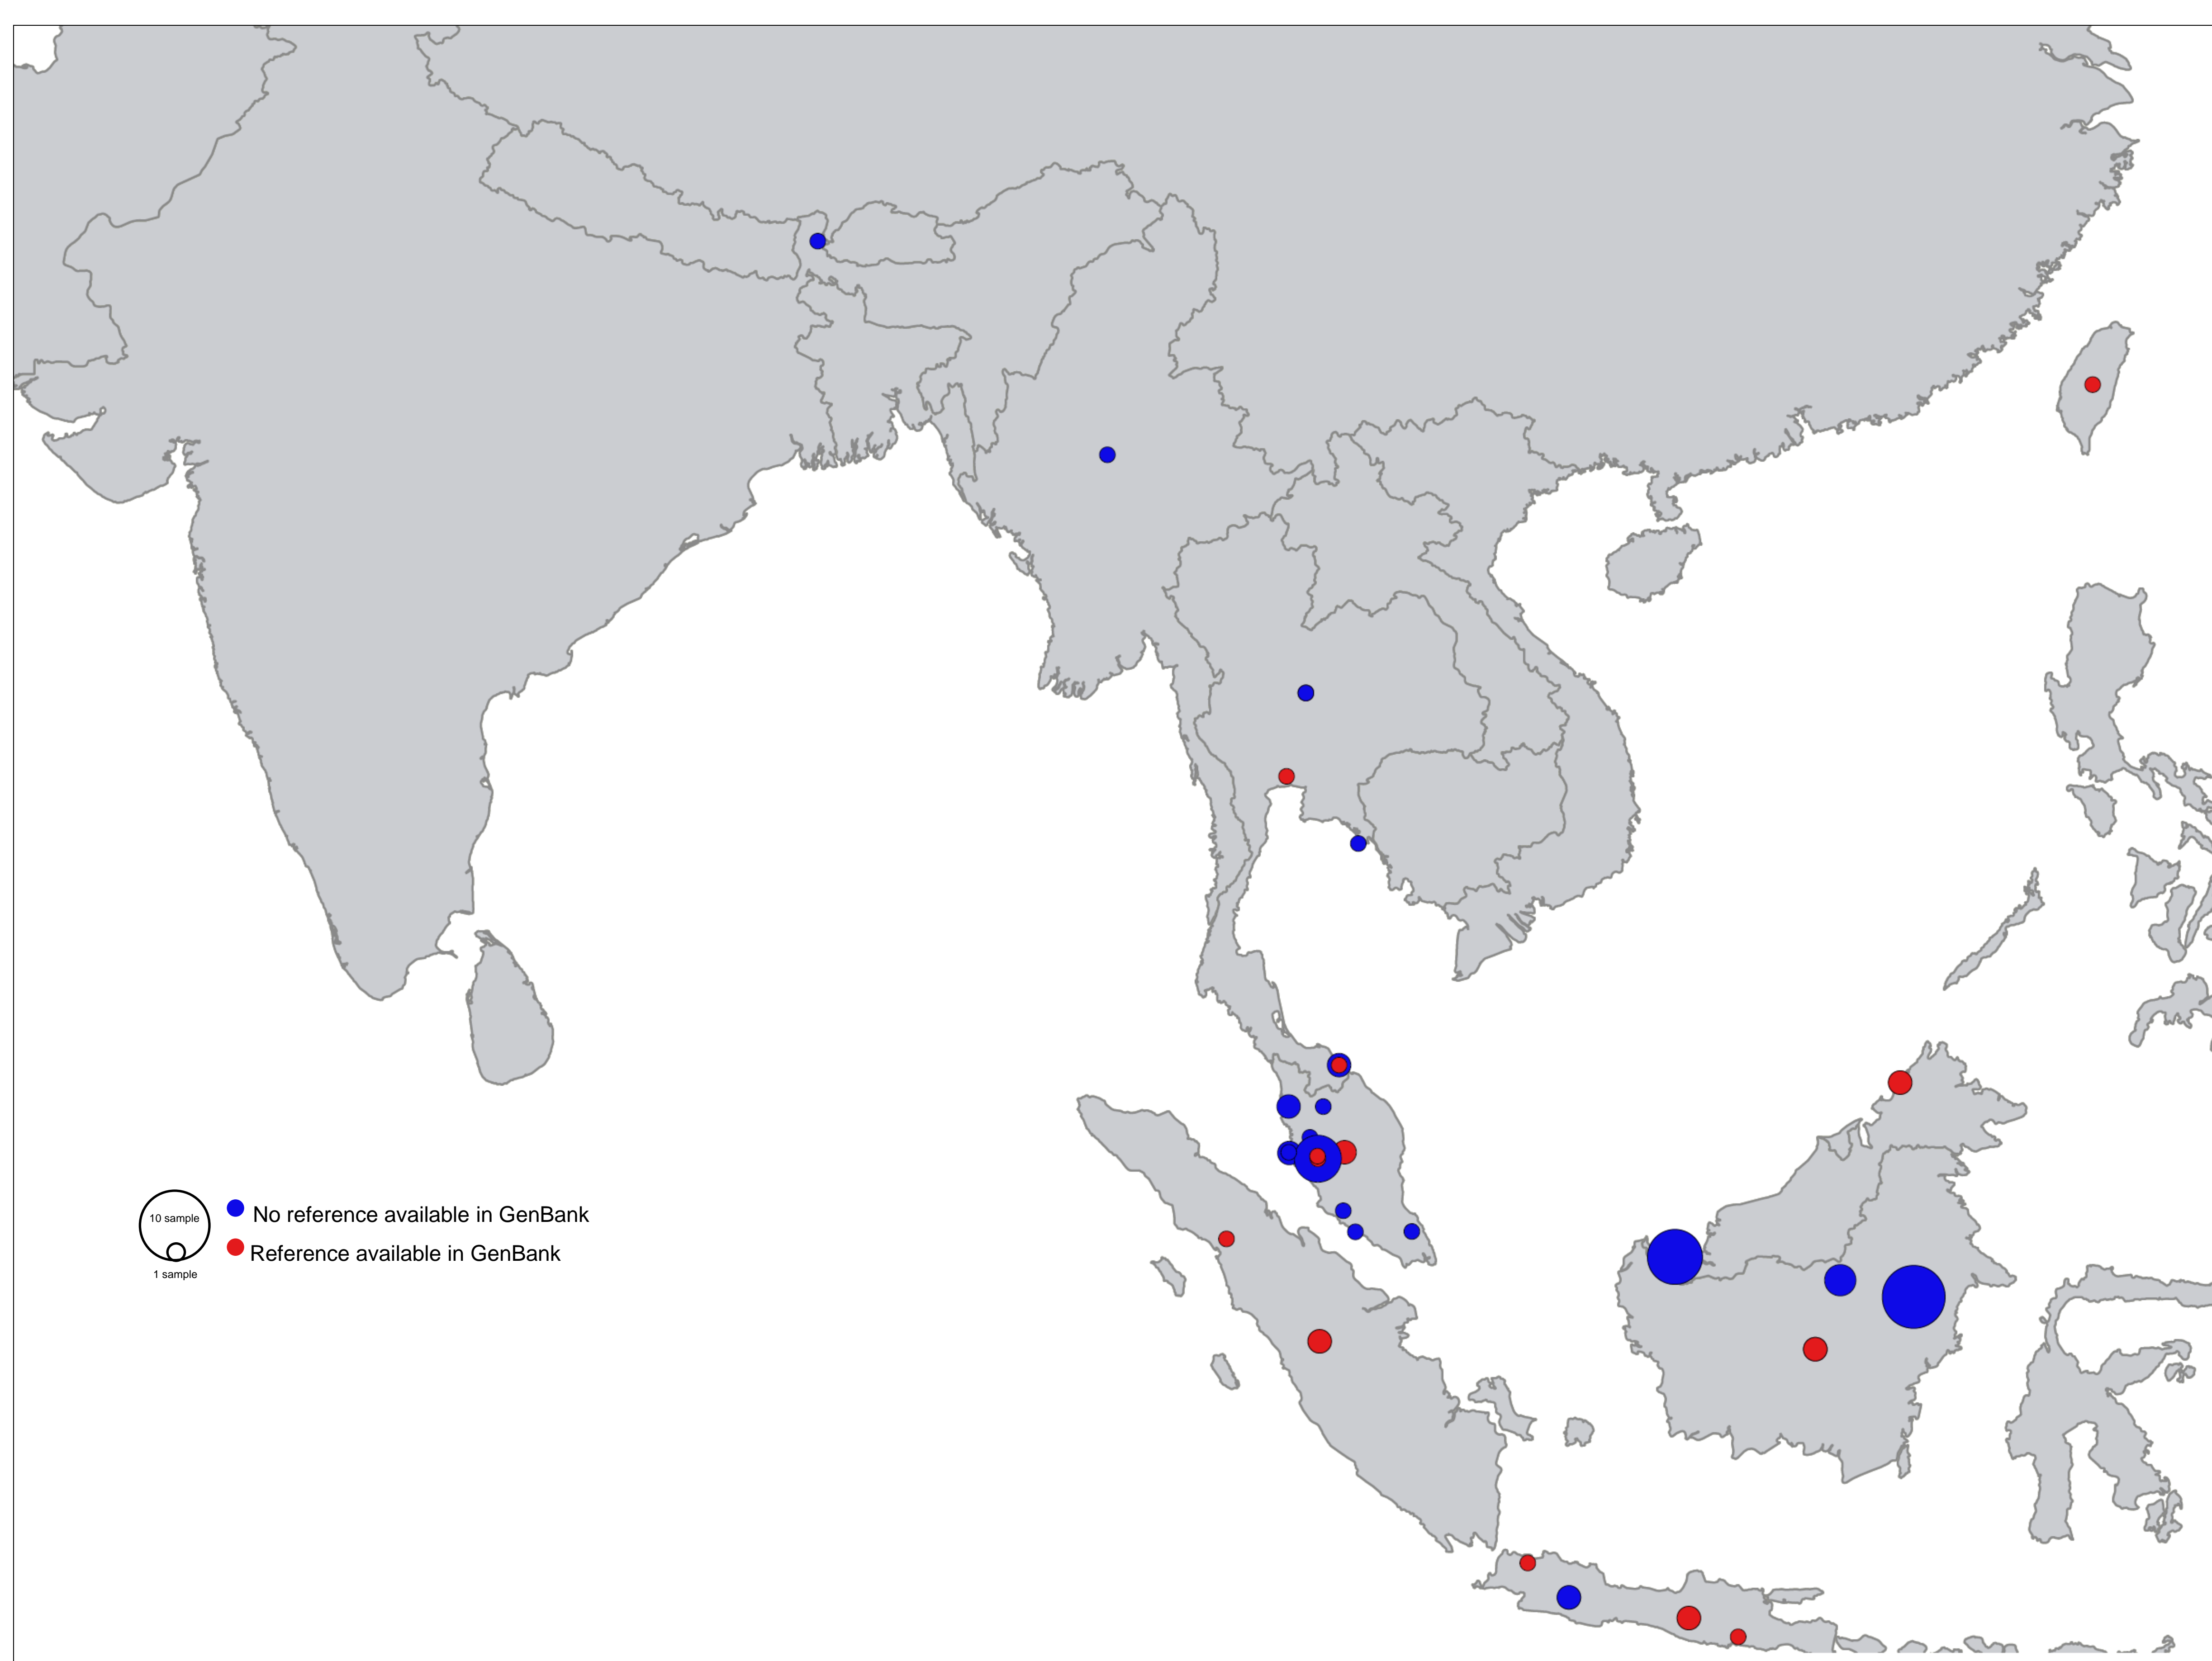

Tree scale: 0.01

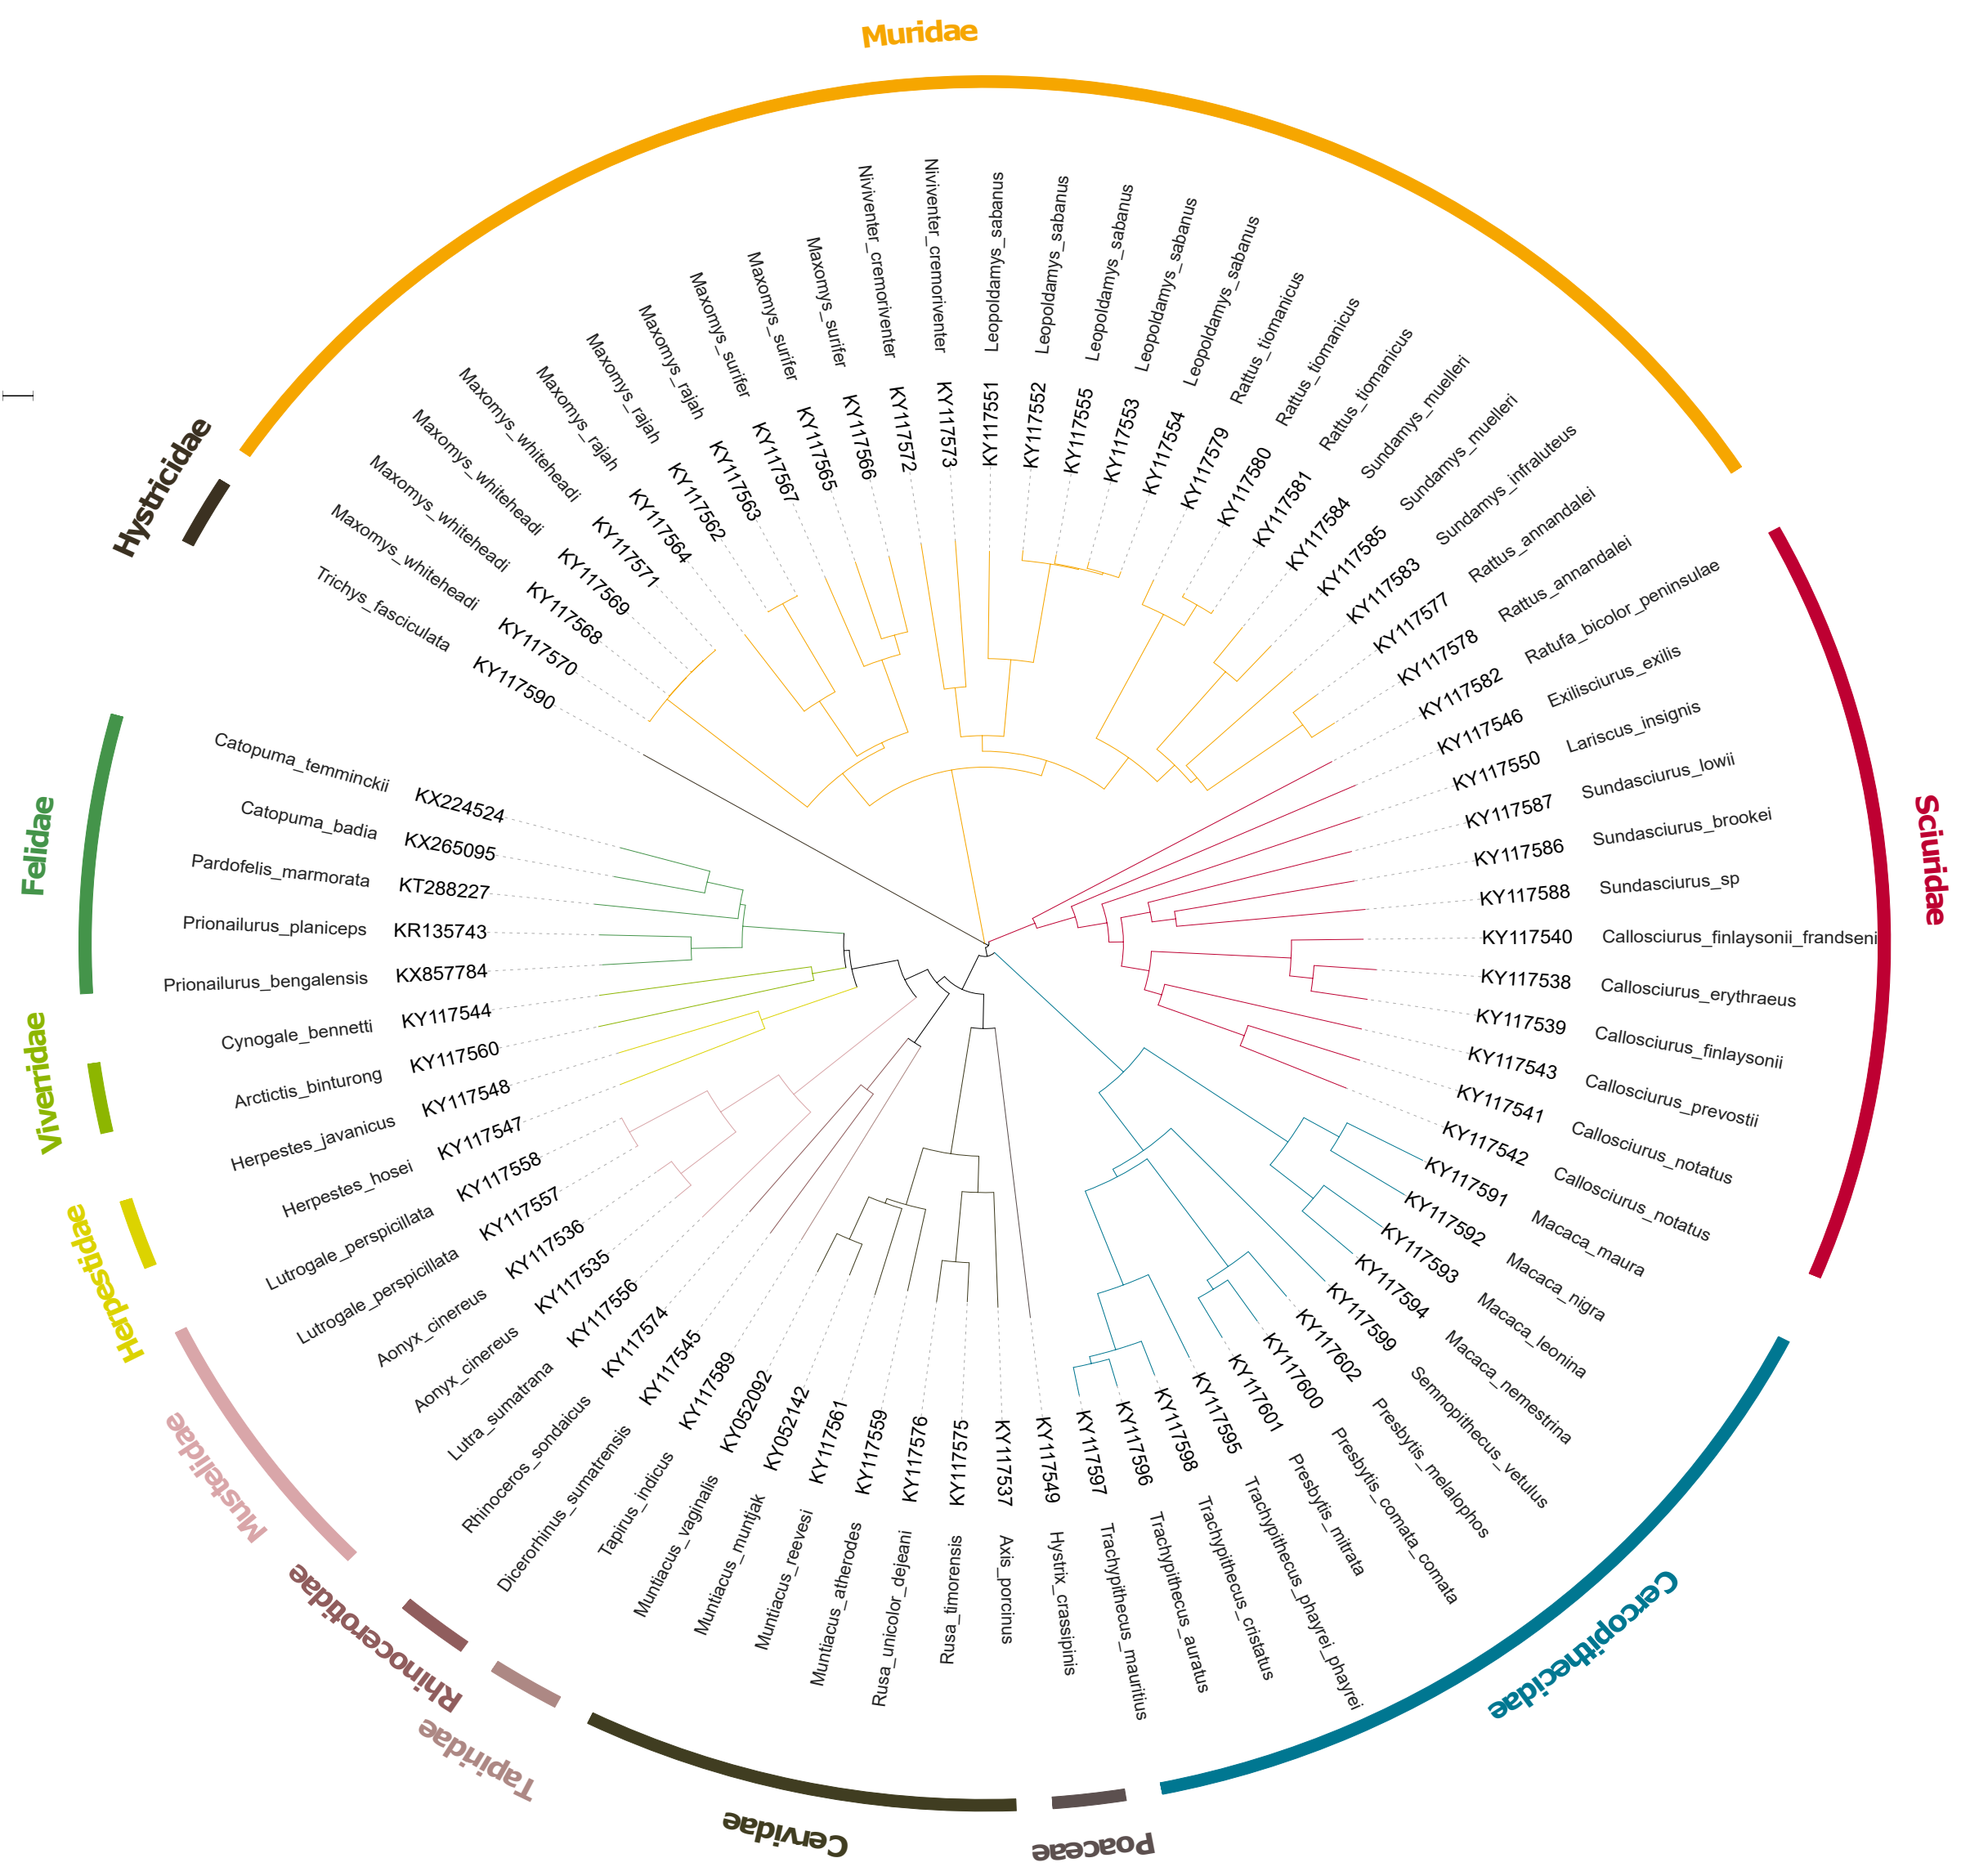

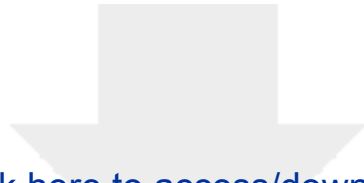

Click here to access/download

**Supplementary Material**

1 Data information\_Sallehetal.docx

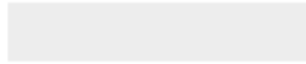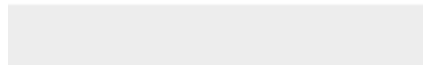



Click here to access/download  
**Supplementary Material**  
1 README file\_Salleh.txt

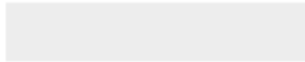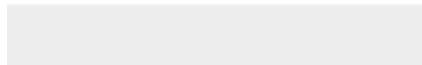

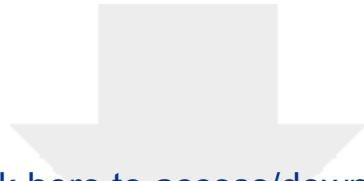

[Click here to access/download](#)

**Supplementary Material**

Additional file 1\_Sallehetal.docx

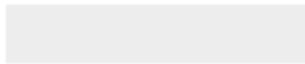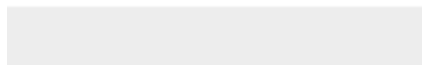



Click here to access/download  
**Supplementary Material**  
Additional file 2\_Sallehetal.xlsx

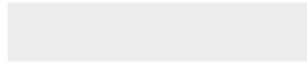

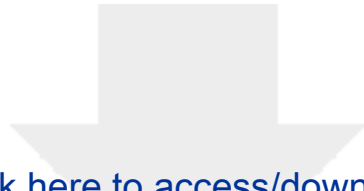

Click here to access/download  
**Supplementary Material**  
Additional file 3\_Sallehetal.fa

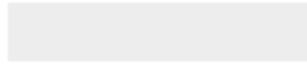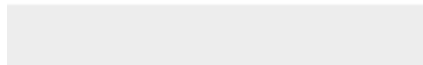



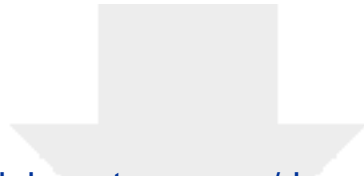

Click here to access/download  
**Supplementary Material**  
Additional file 4 newick.txt

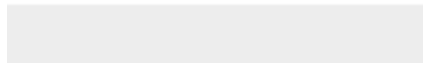

Supplement: gix053_giga-d-17-00015_original-submission.pdf [file gix053_giga-d-17-00015_original-submission.pdf]
