# Supplementary material for: An expanded mammal mitogenome dataset from Southeast Asia
Source: PubMed Central journal article supplement (PMC5737531; doi:10.1093/gigascience/gix053), 2017-07-13

1  
2  
3  
4  
5  
6  
7  
8  
9  
10  
11  
12  
13  
14  
15  
16  
17  
18  
19  
20  
21  
22  
23  
24  
25  
26  
27  
28  
29  
30  
31  
32  
33  
34  
35  
36  
37  
38  
39  
40  
41  
42  
43  
44  
45  
46  
47  
48  
49  
50  
51  
52  
53  
54  
55  
56  
57  
58  
59  
60  
61  
62  
63  
64  
65

1 **Title: An expanded mammal mitogenome dataset from Southeast Asia**

2 Faezah Mohd Salleh<sup>1,2\*</sup>, Jazmín Ramos-Madrigal<sup>1</sup>, Fernando Peñaloza<sup>3,4</sup>, Shanlin Liu<sup>1,5</sup>, Mikkol-Holger S.  
3 Sinding<sup>1,6</sup>, Riddhi P. Patel<sup>3,7</sup>, Renata Martins<sup>3</sup>, Dorina Lenz<sup>3</sup> Jörns Fickel<sup>3,8</sup>, Christian Roos<sup>9</sup>, Mohd Shahir  
4 Shamsir<sup>2</sup>, Mohammad Shahfiz Azman<sup>10</sup>, Burton K. Lim<sup>11</sup>, Stephen J. Rossiter<sup>12</sup>, Andreas Wilting<sup>3</sup>, M.  
5 Thomas P. Gilbert<sup>1,13\*</sup>

6 \*Correspondence: [faezah@fbb.utm.my](mailto:faezah@fbb.utm.my) and [tgilbert@snm.ku.dk](mailto:tgilbert@snm.ku.dk)

7  
8 <sup>1</sup>Centre for GeoGenetics, Natural History Museum of Denmark, University of Copenhagen, Øster  
9 Voldgade 5-7, 1350, Copenhagen, Denmark

10 <sup>2</sup>Faculty of Biosciences and Medical Engineering, Universiti Teknologi Malaysia, 81310 Johor Bahru,  
11 Johor, Malaysia

12 <sup>3</sup>Leibniz Institute for Zoo and Wildlife Research, Alfred-Kowalke Strasse 17, 10315 Berlin, Germany.

13 <sup>4</sup>Undergraduate Program on Genomic Sciences, Universidad Nacional Autonoma de Mexico, 62210  
14 Cuernavaca, Mexico

15 <sup>5</sup>BGI-Shenzhen, Shenzhen, GuangDong, China

16 <sup>6</sup>Natural History Museum, University of Oslo, P.O. Box 1172 Blindern, NO-0318, Oslo, Norway

17 <sup>7</sup>Freie Universität Berlin, Kaiserswerther Str. 16-18, 14195 Berlin, Germany

18 <sup>8</sup>University of Potsdam, Institute for Biochemistry and Biology, Karl-Liebknecht-Str 24-25, 14476  
19 Potsdam, Germany

20 <sup>9</sup>Gene Bank of Primates and Primate Genetics Laboratory, German Primate Center, Leibniz Institute for  
21 Primate Research, Kellnerweg 4, 37077, Göttingen, Germany

22 <sup>10</sup>Forest Biodiversity Division, Forest Research Institute Malaysia, 52109 Kepong, Selangor, Malaysia.

23 <sup>11</sup>Department of Natural History, Royal Ontario Museum, Toronto, Canada

24 <sup>12</sup>School of Biological and Chemical Sciences, Queen Mary University of London, Mile End Road, London  
25 E1 4NS, United Kingdom

26 <sup>13</sup>NTNU University Museum, Norwegian University of Science and Technology, Trondheim, Norway

1  
2  
3  
4  
5  
6  
7  
8  
9  
10  
11  
12  
13  
14  
15  
16  
17  
18  
19  
20  
21  
22  
23  
24  
25  
26  
27  
28  
29  
30  
31  
32  
33  
34  
35  
36  
37  
38  
39  
40  
41  
42  
43  
44  
45  
46  
47  
48  
49  
50  
51  
52  
53  
54  
55  
56  
57  
58  
59  
60  
61  
62  
63  
64  
65

**29 Abstract**

**30 Background:**

31 Southeast (SE) Asia is one of the most biodiverse regions in the world and it holds approximately 20% of  
32 all mammal species. Despite this, the majority of SE Asia's genetic diversity is still poorly characterised.  
33 The growing interest in using environmental DNA (eDNA) to assess and monitor SE Asian species, in  
34 particular threatened mammals - has created the urgent need to expand the available reference database  
35 of mitochondrial barcode and complete mitogenome sequences. We have partially addressed this need  
36 by generating 72 new mitogenome sequences reconstructed from DNA isolated from a range of historical  
37 and modern tissue samples.

**38 Findings:**

39 Approximately 55 gigabases of raw sequence were generated. From this data we assembled 72 complete  
40 mitogenome sequences, with an average depth of coverage of 102.9x and 55.2x for modern samples and  
41 historical samples, respectively. This dataset represents 52 species, of which 30 species had no previous  
42 mitogenome data available. The mitogenomes were geotagged to their sampling location, where known,  
43 to display a detailed geographical distribution of the species.

**44 Conclusion:**

45 Our new database of 52 taxa will strongly enhance the utility of eDNA approaches for monitoring  
46 mammals in SE Asia, as it greatly increases the likelihoods that identification of metabarcoding  
47 sequencing reads can be assigned to reference sequences. This magnifies the confidence in species  
48 detections and thus allows more robust surveys and monitoring programmes of SE Asia's threatened  
49 mammal biodiversity. The extensive collections of historical samples from SE Asia in western and SE  
50 Asian museums should serve as additional valuable material to further enrich this reference database.

**51 Keywords:**

52 invertebrate-derived (iDNA), metabarcoding, GenBank, Taxonomic assignment

1  
2  
3  
4  
5  
6  
7  
8  
9  
10  
11  
12  
13  
14  
15  
16  
17  
18  
19  
20  
21  
22  
23  
24  
25  
26  
27  
28  
29  
30  
31  
32  
33  
34  
35  
36  
37  
38  
39  
40  
41  
42  
43  
44  
45  
46  
47  
48  
49  
50  
51  
52  
53  
54  
55  
56  
57  
58  
59  
60  
61  
62  
63  
64  
65

**57 Data description:**

**58 Context**

59 Southeast (SE) Asia is one of the most biodiverse regions in the world, hosting ~20% of mammal species,  
60 but is experiencing rapid deforestation for agriculture and development. To assess the ecological  
61 consequences of land-use change, there is growing interest in using environmental DNA (eDNA) to  
62 monitor mammal populations, particularly threatened taxa that often underpin conservation policies [1–4].  
63 Yet current efforts are hampered by the lack of a reference database of mitochondrial barcodes and  
64 complete mitogenome sequences. Currently there are 922 mammalian mitogenomes available in  
65 Genbank. Unfortunately most are not tagged by location/origin. Data mining through manual screening of  
66 each mitogenomes resulted in 174 terrestrial mammal species which are typical to SE Asia. In this work,  
67 30 novel species are added, contributing to ~17% expansion of the current SE Asia mammal mitogenome  
68 database.

**70 DNA extraction**

71 Genomic DNA was extracted from different sample types of 72 small mammals, comprising 52 species,  
72 listed in Table 1 and Table 2. DNA from modern tissue and blood samples was isolated using the Qiagen  
73 DNeasy extraction kit (Qiagen, Hilden, Germany) or Invitex DNA extraction kit (Invitex GmbH, Berlin,  
74 Germany), as per standard protocols following the manufacturer's guidelines. Historical samples obtained  
75 from the Zoological Museum, Natural History Museum of Denmark, University of Copenhagen (ZM, KU)  
76 were treated differently according to type of tissue (Additional file 1a), while at the German Primate  
77 Center DNA extraction from museum specimens followed Liedigk et al. (2015) [5]. Complete details of  
78 sample information are provided in Additional file 2.

**80 Mitogenome sequencing, assembly and annotation**

81 Mitogenomes were generated using several approaches. In Copenhagen, author FMS constructed  
82 Illumina shotgun libraries with insert sizes ranging between 50 bp to 400 bp. To construct libraries, DNA  
83 was sheared to the target size range using Bioruptor® XL (Diagenode, USA) and converted into an  
84 Illumina-compatible sequencing library using the NEBNext E6070 kit (New England Biolabs, UK). The

1  
2  
3  
4 85 libraries were PCR amplified with index primers and purified using Qiaquick columns (Qiagen, Hilden,  
5  
6 86 Germany) according to the manufacturer's instruction (Additional file 1b). Multiple libraries were combined  
7  
8 87 together into three pools, normalized to 10 nM and sequenced across three lanes of Illumina HiSeq 2500  
9  
10 88 using SR100bp chemistry. In Berlin and Goettingen, mitogenomes were generated by author PRP and  
11  
12 89 CR using overlapping PCR products using long range PCR (Additional file 1c) followed by library  
13  
14 90 construction and MiSeq sequencing, or Sanger sequencing as described in [6] and [5, 7, 8], respectively.  
15  
16 91 Author RM's mitogenomes were done using methods outlined in [9].  
17  
18 92  
19  
20 93 Raw reads for FMS samples were assembled independently by authors FMS and FP using two different  
21  
22 94 approaches, then compared for consistency. Author FMS trimmed the reads for sequencing adapters, low  
23  
24 95 quality stretches and leading/tailing Ns using AdapterRemoval 1.2 [10]. The mitochondrial genome was  
25  
26 96 reconstructed with MITObim v1.8 [11] using the reference mitogenome of the closest species available in  
27  
28 97 GenBank as the seed reference (Additional file 2). In order to obtain the mapping statistics of the  
29  
30 98 samples, we ran PALEOMIX v 1.2.6 [12] with default parameters where reads shorter than 25 bp after  
31  
32 99 trimming were discarded. The trimmed reads were aligned against the newly assembled mitogenome  
33  
34 100 generated by MITObim using Burrows–Wheeler Aligner (BWA) [13]. Alignments showing low-quality  
35  
36 101 scores and PCR duplicates were further removed using the MarkDuplicates program from Picard tools,  
37  
38 102 and reads were locally realigned around small insertions and deletions (indels) to improve overall genome  
39  
40 103 quality using the IndelRealigner tool from the Genome Analysis Toolkit (GATK)[14]. In contrast, author FP  
41  
42 104 inputted the trimmed reads into mitoMaker (<https://sourceforge.net/projects/mitomaker/>), which performs a  
43  
44 105 de-novo and reference-based assembly using SOAPdenovoTrans v1.03 [15] and MITObim v1.7 [11].  
45  
46 106 Post assembly, the FMS and FP mitogenomes were manually compared for consistency by FMS to  
47  
48 107 generate the final consensus sequences. These assemblies were automatically annotated using  
49  
50 108 tRNAscan-SE v1.4 [16] and BLAST v2.2.29 [17] using the mitochondrial genomes found in the NCBI  
51  
52 109 RefSeq (<https://www.ncbi.nlm.nih.gov/refseq/>) as references.  
53  
54  
55 110  
56  
57 111 For mitogenome constructed by author RM, Illumina sequence reads were de-multiplexed according to  
58  
59 112 the respective indexes with the Illumina software bcl2fastq v2.17 (Illumina, San Diego, CA, USA) and  
60  
61  
62  
63  
64  
65

1  
2  
3  
4 113 adapters were clipped from the sequence reads with the software cutadapt v1.3 [18]. Quality trimming  
5  
6 114 was done through a sliding window approach (10 bp; Q20) and all reads shorter than 20 bp were  
7  
8 115 removed from the analyses. Mitogenome references from target or closely related species were used for  
9  
10 116 mapping of the sequencing reads. Aligned reads were de-duplicated using MarkDuplicates from Picard-  
11  
12 117 tools v1.106 (<https://github.com/broadinstitute/picard>). VariantCalling was carried out using Samtools v1.1  
13  
14 118 [13] and Bcftools v1.2 (<http://github.com/samtools/bcftools>). For each sample, GATK [14] Variant Calling  
15  
16  
17 119 output files were further filtered to have a minimum read coverage  $\geq 3x$ , and variants were only called  
18  
19  
20  
21 120 when the corresponding base was represented by  $\geq 50\%$ , otherwise this position was "N"-masked.  
22

23 121  
24  
25 122 Numbers of raw reads generated for each samples and mapping statistics for all 72 mitogenome  
26  
27 123 assemblies are shown in Additional file 2. Sanger sequenced mitogenomes were checked with 4Peaks  
28  
29 124 1.8 ([www.nucleobytes.com](http://www.nucleobytes.com)), assembled with SeaView 4.5.4 [19] and annotated with DOGMA [20]. All  
30  
31 125 mitogenomes were checked manually by eye to identify possible errors caused by insertion and deletions  
32  
33 126 in Tablet [21]. The final mitochondrial genomes have been uploaded to GenBank (accession numbers are  
34  
35 127 provided in Table 1 and Table 2). The details of all new mitogenomes assembled in this work are given in  
36  
37 128 Table 1 and Table 2. Mitogenomes (60 samples) with known localities were geotagged and mapped to  
38  
39 129 display its geographical distribution (Figure 1).  
40

41 130

### 44 131 **Phylogenetic analysis**

45 132 All the sequenced mitogenomes were aligned using MAFFT v7.158b [22], using the E-INS-i option  
46  
47 133 (Additional file 3). RAxML v8.0.26 [23] was used to perform the phylogenetic analysis with a  
48  
49 134 GTR+GAMMA model of nucleotide substitution. To obtain node support, we used 100 bootstrap pseudo-  
50  
51 135 replicates (Figure 2). The newick file is provided as Additional file 4.  
52

53 136

### 56 137 **Availability of supporting data**

57  
58 138 Raw shotgun data are deposited in the SRA under bioproject number PRJNA361218 and is available in the  
59  
60 139 GigaScience repository, GigaDB <ftp://user27:SallehFaezah@climb.genomics.cn>.  
61  
62  
63  
64  
65

1  
2  
3  
4  
5  
6  
7  
8  
9  
10  
11  
12  
13  
14  
15  
16  
17  
18  
19  
20  
21  
22  
23  
24  
25  
26  
27  
28  
29  
30  
31  
32  
33  
34  
35  
36  
37  
38  
39  
40  
41  
42  
43  
44  
45  
46  
47  
48  
49  
50  
51  
52  
53  
54  
55  
56  
57  
58  
59  
60  
61  
62  
63  
64  
65

**140 Abbreviations**

141 SE: South East; eDNA: environmental deoxyribonucleic acid; bp: basepair; PCR: polymerase chain  
142 reaction; BWA: Burrows–Wheeler Aligner; GATK: Genome Analysis Toolkit; BLAST: Basic Local  
143 Alignment Search Tool; NCBI RefSeq: National Center for Biotechnology Information Reference  
144 Sequence Database; MAFFT: Multiple Alignment using Fast Fourier Transform ; RAxML: Randomized  
145 Axelerated Maximum Likelihood.

146

147

**148 Acknowledgements**

149 This project was funded by the Malaysian Government, Lundbeck Foundation (R52-5062), Leibniz-  
150 Association grant SAW-2013-IZW-2, the German Federal Ministry of Education and Research grant  
151 BMBF FKZ: 01LN1301A and the German Primate Center. We thank the Danish National High-throughput  
152 Sequencing Centre for assistance in generating Illumina data. We also thank the staff of the zoos in  
153 Hannover, Copenhagen, Gettorf, Belfast, Bristol, Howletts Wild Animal Park, the staff of the Ludwig-  
154 Maximilians-University Munich, the Bavarian State Collection Munich, the National Museums Scotland,  
155 Edinburgh, the Natural History Museum Berlin, Naturalis Leiden, and the Zoological Museum, Natural  
156 History Museum of Denmark, University of Copenhagen for providing samples for this work. BKL  
157 gratefully acknowledges the Indonesian and Malaysian government authorities for issuing scientific  
158 permits.

159

**160 Authors' contributions**

161 FMS, AW, JF and MTPG conceived the project. FMS, MHSS, MSS, MSA, RM, PRP, CR, BKL, and SJR  
162 collected the samples and extracted the genomic DNA. FMS, RM, PRP and CR constructed the libraries  
163 and did sequencing. FMS, JRM, FP, SL, PRP, RM, DL and CR assembled the mitogenomes and  
164 performed mitogenome analysis. FMS, SL, PRP and MTPG wrote the article. All authors discussed the  
165 project and data. All authors read and approved the final manuscript.

166

167

1  
2  
3  
4  
5  
6  
7  
8  
9  
10  
11  
12  
13  
14  
15  
16  
17  
18  
19  
20  
21  
22  
23  
24  
25  
26  
27  
28  
29  
30  
31  
32  
33  
34  
35  
36  
37  
38  
39  
40  
41  
42  
43  
44  
45  
46  
47  
48  
49  
50  
51  
52  
53  
54  
55  
56  
57  
58  
59  
60  
61  
62  
63  
64  
65

**168 Competing interests**

169 The authors declare that they have no competing interests.

170

**171 Author details**

172 <sup>1</sup>Centre for GeoGenetics, Natural History Museum of Denmark, University of Copenhagen, Øster

173 Voldgade 5-7, 1350, Copenhagen, Denmark. <sup>2</sup>Faculty of Biosciences and Medical Engineering, Universiti

174 Teknologi Malaysia, 81310 Johor Bahru, Johor, Malaysia. <sup>3</sup>Leibniz Institute for Zoo and Wildlife Research,

175 Alfred-Kowalke Strasse 17, 10315 Berlin, Germany. <sup>4</sup>Undergraduate Program on Genomic Sciences,

176 Universidad Nacional Autonoma de Mexico, 62210 Cuernavaca, Mexico. <sup>5</sup>BGI-Shenzhen, Shenzhen,

177 GuangDong, China. <sup>6</sup>Natural History Museum, University of Oslo, P.O. Box 1172 Blindern, NO-0318,

178 Oslo, Norway. <sup>7</sup>Freie Universität Berlin, Kaiserswerther Str. 16-18, 14195 Berlin, Germany. <sup>8</sup>University of

179 Potsdam, Institute for Biochemistry and Biology, Karl-Liebknecht-Str 24-25, 14476 Potsdam, Germany.

180 <sup>9</sup>Gene Bank of Primates and Primate Genetics Laboratory, German Primate Center, Leibniz Institute for

181 Primate Research, Kellnerweg 4, 37077, Göttingen, Germany. <sup>10</sup>Forest Biodiversity Division, Forest

182 Research Institute Malaysia, 52109 Kepong, Selangor, Malaysia. <sup>11</sup>Department of Natural History, Royal

183 Ontario Museum, Toronto, Canada. <sup>12</sup>School of Biological and Chemical Sciences, Queen Mary

184 University of London, Mile End Road, London E1 4NS, United Kingdom. <sup>13</sup>NTNU University Museum,

185 Norwegian University of Science and Technology, Trondheim, Norway.

186

187

188

189

190

191

192

193

194

195

1  
2  
3  
4  
5  
6  
7  
8  
9  
10  
11  
12  
13  
14  
15  
16  
17  
18  
19  
20  
21  
22  
23  
24  
25  
26  
27  
28  
29  
30  
31  
32  
33  
34  
35  
36  
37  
38  
39  
40  
41  
42  
43  
44  
45  
46  
47  
48  
49  
50  
51  
52  
53  
54  
55  
56  
57  
58  
59  
60  
61  
62  
63  
64  
65

**References**

- 196 1. Bohmann K, Evans A, Gilbert MTP, Carvalho GR, Creer S, Knapp M, Yu DW, de Bruyn M (2014)  
197 Environmental DNA for wildlife biology and biodiversity monitoring. *Trends Ecol Evol* 29:358–367  
198
- 199 2. Lee P-S, Gan HM, Clements GR, Wilson J-J (2016) Field calibration of blowfly-derived DNA against  
200 traditional methods for assessing mammal diversity in tropical forests. *Genome* 59:1008–1022  
201
- 202 3. Schnell IB, Sollmann R, Calvignac-Spencer S, Siddall ME, Douglas WY, Wilting A, Gilbert MTP  
203 (2015) iDNA from terrestrial haematophagous leeches as a wildlife surveying and monitoring tool--  
204 prospects, pitfalls and avenues to be developed. *Front Zool* 12:24  
205
- 206 4. Schnell IB, Thomsen PF, Wilkinson N, Rasmussen M, Jensen LRD, Willerslev E, Bertelsen MF,  
207 Gilbert MTP (2012) Screening mammal biodiversity using DNA from leeches. *Curr Biol* 22:R262–3  
208
- 209 5. Liedigk R, Kolleck J, Böker KO, et al (2015) Mitogenomic phylogeny of the common long-tailed  
210 macaque (*Macaca fascicularis fascicularis*). *BMC Genomics* 16:222  
211
- 212 6. Patel RP, Förster DW, Kitchener AC, et al (2016) Two species of Southeast Asian cats in the genus  
213 *Catopuma* with diverging histories: an island endemic forest specialist and a widespread habitat  
214 generalist. *Open Science* 3:160350  
215
- 216 7. Roos C, Zinner D, Kubatko LS, et al (2011) Nuclear versus mitochondrial DNA: evidence for  
217 hybridization in colobine monkeys. *BMC Evol Biol* 11:77  
218
- 219 8. Liedigk R, Roos C, Brameier M, Zinner D (2014) Mitogenomics of the Old World monkey tribe  
220 Papionini. *BMC Evol Biol* 14:176  
221
- 222 9. Fortes GG, Paijmans JLA (2015) Analysis of Whole Mitogenomes from Ancient Samples. *Methods*  
223 *Mol Biol* 1347:179–195  
224
- 225 10. Lindgreen S (2012) AdapterRemoval: easy cleaning of next-generation sequencing reads. *BMC Res*  
226 *Notes* 5:337  
227
- 228 11. Hahn C, Bachmann L, Chevreur B (2013) Reconstructing mitochondrial genomes directly from  
229 genomic next-generation sequencing reads—a baiting and iterative mapping approach. *Nucleic*  
230 *Acids Res.*  
231
- 232 12. Schubert M, Ermini L, Der Sarkissian C, et al (2014) Characterization of ancient and modern  
233 genomes by SNP detection and phylogenomic and metagenomic analysis using PALEOMIX. *Nat*



1  
2  
3  
4 224 Protoc 9:1056–1082  
5  
6 225 13. Li H, Durbin R (2009) Fast and accurate short read alignment with Burrows–Wheeler transform.  
7  
8 226 Bioinformatics 25:1754–1760  
9  
10 227 14. McKenna A, Hanna M, Banks E, et al (2010) The Genome Analysis Toolkit: a MapReduce framework  
11  
12 228 for analyzing next-generation DNA sequencing data. *Genome Res* 20:1297–1303  
13  
14 229 15. Xie Y, Wu G, Tang J, et al (2014) SOAPdenovo-Trans: de novo transcriptome assembly with short  
15  
16 230 RNA-Seq reads. *Bioinformatics* 30:1660–1666  
17  
18 231 16. Lowe TM, Eddy SR (1997) tRNAscan-SE: a program for improved detection of transfer RNA genes in  
19  
20 232 genomic sequence. *Nucleic Acids Res* 25:955–964  
21  
22 233 17. Camacho C, Coulouris G, Avagyan V, Ma N, Papadopoulos J, Bealer K, Madden TL (2009) BLAST+:  
23  
24 234 architecture and applications. *BMC Bioinformatics* 10:421  
25  
26 235 18. Martin M (2011) Cutadapt removes adapter sequences from high-throughput sequencing reads.  
27  
28 236 *EMBnet.journal* 17:10–12  
29  
30 237 19. Gouy M, Guindon S, Gascuel O (2010) SeaView version 4: A multiplatform graphical user interface  
31  
32 238 for sequence alignment and phylogenetic tree building. *Mol Biol Evol* 27:221–224  
33  
34 239 20. Wyman SK, Jansen RK, Boore JL (2004) Automatic annotation of organellar genomes with DOGMA.  
35  
36 240 *Bioinformatics* 20:3252–3255  
37  
38 241 21. Milne I, Stephen G, Bayer M, Cock PJA, Pritchard L, Cardle L, Shaw PD, Marshall D (2012) Using  
39  
40 242 Tablet for visual exploration of second-generation sequencing data. *Brief Bioinform* bbs012  
41  
42 243 22. Katoh K, Standley DM (2013) MAFFT multiple sequence alignment software version 7: improvements  
43  
44 244 in performance and usability. *Mol Biol Evol* 30:772–780  
45  
46 245 23. Stamatakis A (2014) RAxML version 8: a tool for phylogenetic analysis and post-analysis of large  
47  
48 246 phylogenies. *Bioinformatics* 30:1312–1313  
49  
50  
51 247  
52  
53 248  
54  
55 249  
56  
57 250  
58  
59 251  
60  
61  
62  
63  
64  
65

1  
2  
3  
4  
5  
6  
7  
8  
9  
10  
11  
12  
13  
14  
15  
16  
17  
18  
19  
20  
21  
22  
23  
24  
25  
26  
27  
28  
29  
30  
31  
32  
33  
34  
35  
36  
37  
38  
39  
40  
41  
42  
43  
44  
45  
46  
47  
48  
49  
50  
51  
52  
53  
54  
55  
56  
57  
58  
59  
60  
61  
62  
63  
64  
65

**252 Tables and Figures**

- 253 1. Table 1: List of mitogenomes assembled in this work that supplement pre-existing mitogenome
- 254 references already available in GenBank
- 255 2. Table 2: List of mitogenomes assembled in this work that have no previous complete mitogenome
- 256 reference available in GenBank
- 257 3. Figure 1: Geographical distribution of mitogenomes assembled in this work (60 mitogenomes with
- 258 known locality)
- 259 4. Figure 2: Phylogenetic tree of mitogenomes assembled in this work

260

261

**262 Additional files**

- 263 1. Additional file 1: DNA extraction of historical samples, library construction and primer information
- 264 2. Additional file 2: Sample information sheet of mitogenomes assembled in this work
- 265 3. Additional file 3: Alignment of mitogenomes assembled in this work
- 266 4. Additional file 4: Newick file for phylogenetic tree

267

268

269

**Table 1: List of mitogenomes assembled in this work that supplement pre-existing mitogenome references already available in GenBank**

| No | GenBank ID | Common name                   | Genus               | Species            | Assembly Size | Locality                                   | Source                                                    | Sample date of collection | Data by |
|----|------------|-------------------------------|---------------------|--------------------|---------------|--------------------------------------------|-----------------------------------------------------------|---------------------------|---------|
| 1  | KY117537   | Hog deer                      | <i>Axis</i>         | <i>porcinus</i>    | 16402         | Copenhagen Zoo                             | ZM, KU                                                    | 21/8/1912                 | FMS/FP  |
| 3  | KX265095   | Bay Cat                       | <i>Catopuma</i>     | <i>badia</i>       | 16960         | Sabah, Malaysia                            | National Museum Scotland                                  | 20/04/2000                | PRP     |
| 5  | KY117545   | Sumatran Rhino                | <i>Dicerorhinus</i> | <i>sumatrensis</i> | 16466         | Sumatra, Indonesia                         | Naturalis, Leiden, The Netherlands                        | 1880                      | RM      |
| 6  | KY117546   | Least pygmy squirrel          | <i>Exilisciurus</i> | <i>exilis</i>      | 16637         | Indonesia                                  | ROM                                                       | 16/06/1993                | FMS/FP  |
| 7  | KY117548   | Hose's mongoose               | <i>Herpestes</i>    | <i>javanicus</i>   | 16340         | Java, Indonesia                            | ZM, KU                                                    | 12/3/1947                 | FMS/FP  |
| 8  | KY117550   | Three-striped ground Squirrel | <i>Lariscus</i>     | <i>indsignis</i>   | 16399         | Maybe Malaysia                             | ZM, KU                                                    | unknown                   | FMS/FP  |
| 9  | KY117592   | Black Crested Macaque         | <i>Macaca</i>       | <i>nigra</i>       | 16558         | captive                                    | Gettorf Zoo, Germany                                      | 18/07/2000                | CR      |
| 10 | KY117593   | Northern Pig-tailed Macaque   | <i>Macaca</i>       | <i>leonina</i>     | 16554         | captive                                    | Ludwig-Maximilians-University Munich, Germany             | 6/3/1995                  | CR      |
| 11 | KY117594   | Southern pig-tailed macaque   | <i>Macaca</i>       | <i>nemestrina</i>  | 16531         | Peninsular Malaysia                        | National Museum Scotland, Edinburgh, UK                   | unknown                   | CR      |
| 12 | KT288227   | Marbled Cat                   | <i>Pardofelis</i>   | <i>marmorata</i>   | 17218         | Sumatra, Indonesia                         | National Archaeological Museum of the Netherlands, Leiden | 30/08/1930                | PRP     |
| 13 | KY117602   | Sumatra Surili                | <i>Presbytis</i>    | <i>melalophos</i>  | 16558         | captive                                    | Howletts Wild Animal Park, UK                             | 23/7/1999                 | CR      |
| 14 | KR135743   | Flat-headed Cat               | <i>Prionailurus</i> | <i>planiceps</i>   | 17704         | Sabah, Malaysia                            | Sabah wildlife department                                 | 25/04/2000                | PRP     |
| 15 | KY117580   | Malayan Field Rat             | <i>Rattus</i>       | <i>tiomanicus</i>  | 16415         | SPF Bidor, Perak, Malaysia                 | FRIM                                                      | 12/2/2011                 | FMS/FP  |
| 16 | KY117579   | Malayan Field Rat             | <i>Rattus</i>       | <i>tiomanicus</i>  | 16312         | Indonesia                                  | ROM                                                       | 01/06/1993                | FMS/FP  |
| 17 | KY117581   | Malayan Field Rat             | <i>Rattus</i>       | <i>tiomanicus</i>  | 16305         | Hutan Simpan Chikus, Tapah Perak, Malaysia | FRIM                                                      | 13/1/2011                 | FMS/FP  |
| 18 | KY117574   | Javan Rhino                   | <i>Rhinoceros</i>   | <i>sondaicus</i>   | 16417         | Java, Indonesia                            | Copenhagen Natural History Museum                         | unknown                   | RM      |
| 20 | KY117575   | Javan Rusa                    | <i>Rusa</i>         | <i>timorensis</i>  | 16437         | Toeloeng Agoeng, West Java, Indonesia      | Naturalis, Leiden, The Netherlands                        | unknown                   | RM      |

|    |          |                             |                       |                         |       |                          |                                           |           |        |
|----|----------|-----------------------------|-----------------------|-------------------------|-------|--------------------------|-------------------------------------------|-----------|--------|
| 21 | KY117576 | Indian Sambar Deer          | <i>Rusa</i>           | <i>unicolor dejeani</i> | 16437 | Mentawai, Indonesia      | Naturalis, Leiden, The Netherlands        | unknown   | RM     |
| 22 | KY117599 | Western Purple-faced Langur | <i>Semnopithecus</i>  | <i>vetulus</i>          | 16545 | captive                  | Belfast Zoo, UK                           | 9/11/1998 | CR     |
| 23 | KY117589 | Malayan Tapir               | <i>Tapirus</i>        | <i>indicus</i>          | 16794 | captive                  | Copenhagen Zoo                            | 11/1/2015 | FMS/FP |
| 24 | KY117598 | Silvered Langur             | <i>Trachypithecus</i> | <i>cristatus</i>        | 16551 | North Sumatra, Indonesia | Bavarian State Collection Munich, Germany | 1911      | CR     |

---

ZM, KU: Zoological Museum, University of Copenhagen; ROM: Royal Ontario Museum; FRIM: Forest Research Institute, Malaysia

**Table 2: List of mitogenomes assembled in this work that have no previous complete mitogenome reference available in GenBank**

| No | GenBank ID | Common name              | Genus               | Species              | Assembly Size | Locality                                       | Source                                    | Sample date of collection | Data by |
|----|------------|--------------------------|---------------------|----------------------|---------------|------------------------------------------------|-------------------------------------------|---------------------------|---------|
| 1  | KY117536   | Asian Small-clawed Otter | <i>Aonyx</i>        | <i>cinereus</i>      | 16153         | captive                                        | Copenhagen Zoo                            | 08/08/11                  | FMS/FP  |
| 2  | KY117535   | Asian Small-clawed Otter | <i>Aonyx</i>        | <i>cinereus</i>      | 16153         | Sarawak, Malaysia                              | British Museum of Natural History, London | 25/8/2010                 | FMS/FP  |
| 3  | KY117560   | Binturong                | <i>Arctictis</i>    | <i>binturong</i>     | 17067         | unknown                                        | Tierpark, Berlin                          | 29/11/2010                | PRP     |
| 4  | KY117541   | Plantain Squirrel        | <i>Callosciurus</i> | <i>notatus</i>       | 16582         | Hutan Bidor, Perak, Malaysia                   | FRIM                                      | 11/2/2011                 | FMS/FP  |
| 5  | KY117542   | Plantain squirrel        | <i>Callosciurus</i> | <i>notatus</i>       | 16599         | East Kalimantan, Indonesia                     | ROM                                       | 03/06/1993                | FMS/FP  |
| 6  | KY117543   | Prevost's squirrel       | <i>Callosciurus</i> | <i>prevostii</i>     | 16674         | East Kalimantan, Indonesia                     | ROM                                       | 15/06/1993                | FMS/FP  |
| 7  | KY117540   | Variable squirrel        | <i>Callosciurus</i> | <i>finlaysonii</i>   | 15747         | Koh Chang, Thailand                            | ZM, KU                                    | 14/1/1900                 | FMS/FP  |
| 8  | KY117539   | Variable squirrel        | <i>Callosciurus</i> | <i>finlaysonii</i>   | 16489         | Central Thailand                               | ZM, KU                                    | 2/2/1928                  | FMS/FP  |
| 9  | KY117544   | Sunda Otter Civet        | <i>Cynogale</i>     | <i>bennetti</i>      | 15784         | Borneo                                         | British Museum of Natural History, London | 25/8/2010                 | FMS/FP  |
| 10 | KY117549   | Greater Mouse deer       | <i>Tragulus</i>     | <i>napu</i>          | 15778         | Bang Nara, Thailand                            | ZM, KU                                    | 10.11.1931                | FMS/FP  |
| 11 | KY117552   | Long-tailed Giant Rat    | <i>Leopoldamys</i>  | <i>sabanus</i>       | 15973         | G. Telapak Buruk, Negeri Sembilan, Malaysia    | FRIM                                      | 24/2/2010                 | FMS/FP  |
| 12 | KY117553   | Long-tailed Giant Rat    | <i>Leopoldamys</i>  | <i>sabanus</i>       | 15972         | Teluk Segadas, P. Pangkor, Perak, Malaysia     | FRIM                                      | 19/3/2010                 | FMS/FP  |
| 13 | KY117554   | Long-tailed Giant Rat    | <i>Leopoldamys</i>  | <i>sabanus</i>       | 15974         | Hutan Simpan Temengor, Gerik Perak, Malaysia   | FRIM                                      | 23/1/2014                 | FMS/FP  |
| 14 | KY117555   | Long-tailed Giant Rat    | <i>Leopoldamys</i>  | <i>sabanus</i>       | 15972         | Hutan Simpan Lenggong, Kluang, Johor, Malaysia | FRIM                                      | 19/2/2014                 | FMS/FP  |
| 15 | KY117551   | Long-tailed giant rat    | <i>Leopoldamys</i>  | <i>sabanus</i>       | 15974         | Malaysia                                       | ROM                                       | 28/05/1993                | FMS/FP  |
| 16 | KY117556   | Hairy-nosed otter        | <i>Lutra</i>        | <i>sumatrana</i>     | 16580         | Bang Nara, Thailand                            | ZM, KU                                    | 1/4/1939                  | FMS/FP  |
| 17 | KY117557   | Smooth-coated otter      | <i>Lutrogale</i>    | <i>perspicillata</i> | 16042         | Melaka, Malaysia                               | British Museum of Natural History, London | 25/8/2010                 | FMS/FP  |

|    |          |                        |                     |                      |       |                                                 |                                                |            |        |
|----|----------|------------------------|---------------------|----------------------|-------|-------------------------------------------------|------------------------------------------------|------------|--------|
| 18 | KY117558 | Smooth-coated otter    | <i>Lutrogale</i>    | <i>perspicillata</i> | 16041 | Bang Nara, Thailand                             | ZM, KU                                         | 24/1/1933  | FMS/FP |
| 19 | KY117591 | Moor macaque           | <i>Macaca</i>       | <i>maura</i>         | 16563 | captive                                         | Hannover Zoo, Germany                          | 20/8/1998  | CR     |
| 20 | KY117564 | Rajah/Brown Spiny Rat  | <i>Maxomys</i>      | <i>rajah</i>         | 16200 | Indonesia                                       | ROM                                            | 06/06/1993 | FMS/FP |
| 21 | KY117562 | Rajah/Brown Spiny Rat  | <i>Maxomys</i>      | <i>rajah</i>         | 16296 | Teluk Segadas, P. Pangkor, Perak, Malaysia      | FRIM                                           | 19/3/2010  | FMS/FP |
| 22 | KY117563 | Rajah/Brown Spiny Rat  | <i>Maxomys</i>      | <i>rajah</i>         | 16296 | Pasir Bogak, P. Pangkor, Perak, Malaysia        | FRIM                                           | 18/3/2010  | FMS/FP |
| 23 | KY117567 | Red Spiny Rat          | <i>Maxomys</i>      | <i>surifer</i>       | 16286 | 50 ha, Pasoh, Negeri Sembilan, Malaysia         | FRIM                                           | 12/6/2008  | FMS/FP |
| 24 | KY117566 | Red Spiny Rat          | <i>Maxomys</i>      | <i>surifer</i>       | 16290 | Indonesia                                       | ROM                                            | 21/05/1993 | FMS/FP |
| 25 | KY117565 | Red Spiny Rat          | <i>Maxomys</i>      | <i>surifer</i>       | 16286 | Malaysia                                        | ROM                                            | 17/05/2013 | FMS/FP |
| 26 | KY117570 | Whitehead's Spiny Rat  | <i>Maxomys</i>      | <i>whiteheadi</i>    | 16316 | Hutan Simpan Bikam, Perak, Malaysia             | FRIM                                           | 12/2/2011  | FMS/FP |
| 27 | KY117571 | Whitehead's Spiny Rat  | <i>Maxomys</i>      | <i>whiteheadi</i>    | 16316 | Keruing Trail, FRIM, Kepong, Selangor, Malaysia | FRIM                                           | 13/3/2013  | FMS/FP |
| 28 | KY117568 | Whitehead's Spiny Rat  | <i>Maxomys</i>      | <i>whiteheadi</i>    | 16287 | Hutan Simpan Bikam, Perak, Malaysia             | FRIM                                           | 12/2/2011  | FMS/FP |
| 29 | KY117569 | Whitehead's Spiny Rat  | <i>Maxomys</i>      | <i>whiteheadi</i>    | 16429 | Bukit Tapah, Perak, Malaysia                    | FRIM                                           | 23/3/2011  | FMS/FP |
| 30 | KY052142 | Indian muntjac         | <i>Muntiacus</i>    | <i>muntjak</i>       | 16354 | West Java, Indonesia                            | Vienna NHM                                     | 1858       | RM     |
| 31 | KY117559 | Bornean yellow muntjac | <i>Muntiacus</i>    | <i>atherodes</i>     | 16354 | Koemai, West Borneo                             | Bonn NHM                                       | 1938       | RM     |
| 32 | KY117573 | Dark-tailed Tree Rat   | <i>Niviventer</i>   | <i>cremoriventer</i> | 16322 | Track 5 (G.Inas), Kedah, Malaysia               | FRIM                                           | 5/11/2009  | FMS/FP |
| 33 | KY117572 | Dark-tailed tree rat   | <i>Niviventer</i>   | <i>cremoriventer</i> | 16234 | Malaysia                                        | ROM                                            | 17/05/2013 | FMS/FP |
| 34 | KY117600 | Grizzled Leaf Monkey   | <i>Presbytis</i>    | <i>comata comata</i> | 16551 | captive                                         | Howletts Wild Animal Park, UK                  | 23/12/1999 | CR     |
| 35 | KY117601 | Mitred Leaf Monkey     | <i>Presbytis</i>    | <i>mitrata</i>       | 16555 | captive                                         | Howletts Wild Animal Park, UK                  | 12/11/1998 | CR     |
| 36 | KX857784 | Leopard cat            | <i>Prionailurus</i> | <i>bengalensis</i>   | 16989 | Thailand                                        | American Museum of National History, New York. | 25/02/1924 | PRP    |

|    |          |                          |                       |                        |       |                                     |                                        |            |        |
|----|----------|--------------------------|-----------------------|------------------------|-------|-------------------------------------|----------------------------------------|------------|--------|
| 37 | KY117578 | Annandale's Sundaic Rat  | <i>Rattus</i>         | <i>annandalei</i>      | 16297 | Hutan Simpan Bikam, Perak, Malaysia | FRIM                                   | 12/2/2011  | FMS/FP |
| 38 | KY117577 | Annandale's Sundaic Rat  | <i>Rattus</i>         | <i>annandalei</i>      | 16301 | Hutan Simpan Bikam, Perak, Malaysia | FRIM                                   | 11/2/2011  | FMS/FP |
| 39 | KY117583 | Mountain giant Sunda rat | <i>Sundamys</i>       | <i>infraluteus</i>     | 16297 | Malaysia                            | ROM                                    | 18/05/2013 | FMS/FP |
| 40 | KY117585 | Müller's Giant Sunda Rat | <i>Sundamys</i>       | <i>meulleri</i>        | 16326 | Track 1 (G.Inas), Kedah, Malaysia   | FRIM                                   | 5/11/2009  | FMS/FP |
| 41 | KY117584 | Müller's giant Sunda rat | <i>Sundamys</i>       | <i>meulleri</i>        | 16304 | Malaysia                            | ROM                                    | 01/06/2013 | FMS/FP |
| 42 | KY117586 | Brooke's squirrel        | <i>Sundasciurus</i>   | <i>brookei</i>         | 16417 | East Kalimantan, Indonesia          | ROM                                    | 13/06/1993 | FMS/FP |
| 43 | KY117587 | Low's squirrel           | <i>Sundasciurus</i>   | <i>lowii</i>           | 16307 | East Kalimantan, Indonesia          | ROM                                    | 06/06/1993 | FMS/FP |
| 44 | KY117588 | name pending             | <i>Sundasciurus</i>   | <i>sp</i>              | 16458 | East Kalimantan, Indonesia          | ROM                                    | 21/06/1993 | FMS/FP |
| 45 | KY117595 | Phayre's Langur          | <i>Trachypithecus</i> | <i>phayrei phayrei</i> | 16548 | South West Myanmar                  | Natural History Museum Berlin, Germany | unknown    | CR     |
| 46 | KY117596 | East Javan Ebony Langur  | <i>Trachypithecus</i> | <i>auratus</i>         | 16552 | captive                             | Bristol Zoo, UK                        | 26/10/2010 | CR     |
| 47 | KY117597 | West Javan Ebony Langur  | <i>Trachypithecus</i> | <i>mauritus</i>        | 16554 | West Java, Indonesia                | Naturalis Leiden; Netherlands          | unknown    | CR     |
| 48 | KY117590 | Long-tailed porcupine    | <i>Trichys</i>        | <i>fasciculata</i>     | 16328 | Borneo                              | ZM, KU                                 | 5/10/1894  | FMS/FP |

ZM, KU: Zoological Museum, University of Copenhagen; ROM: Royal Ontario Museum; FRIM: Forest Research Institute, Malaysia; NHM: Natural History Museum

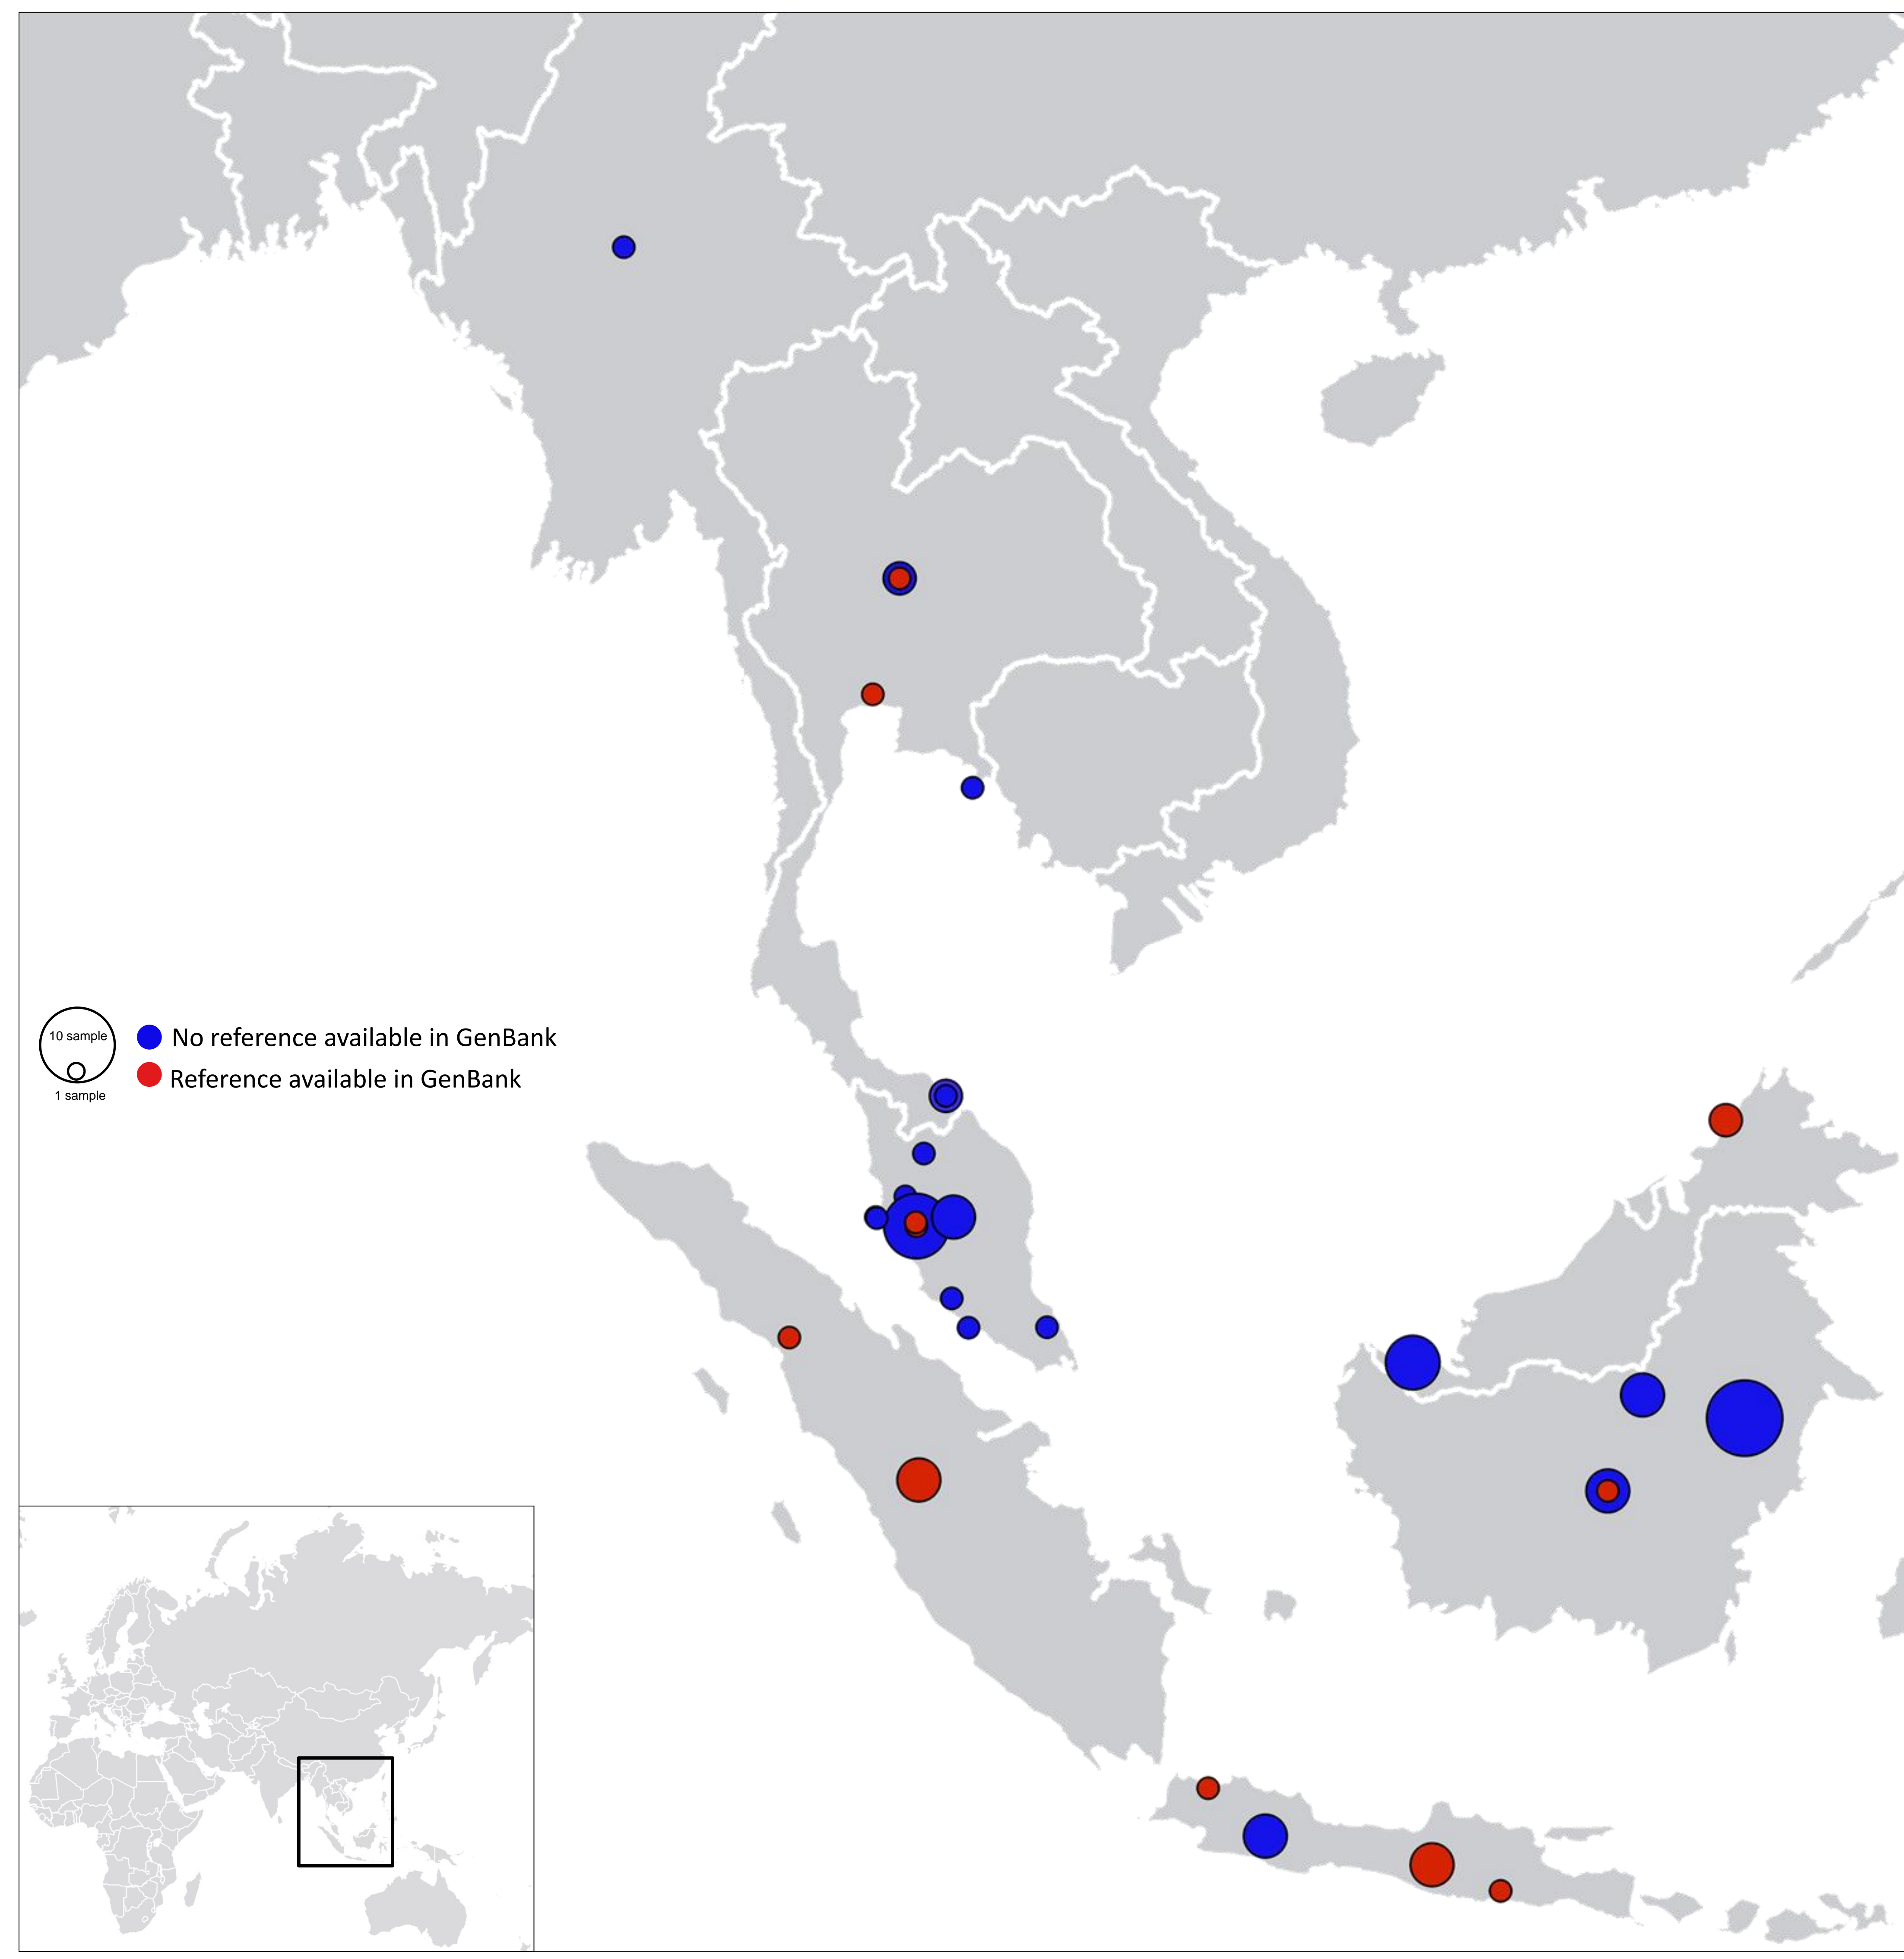



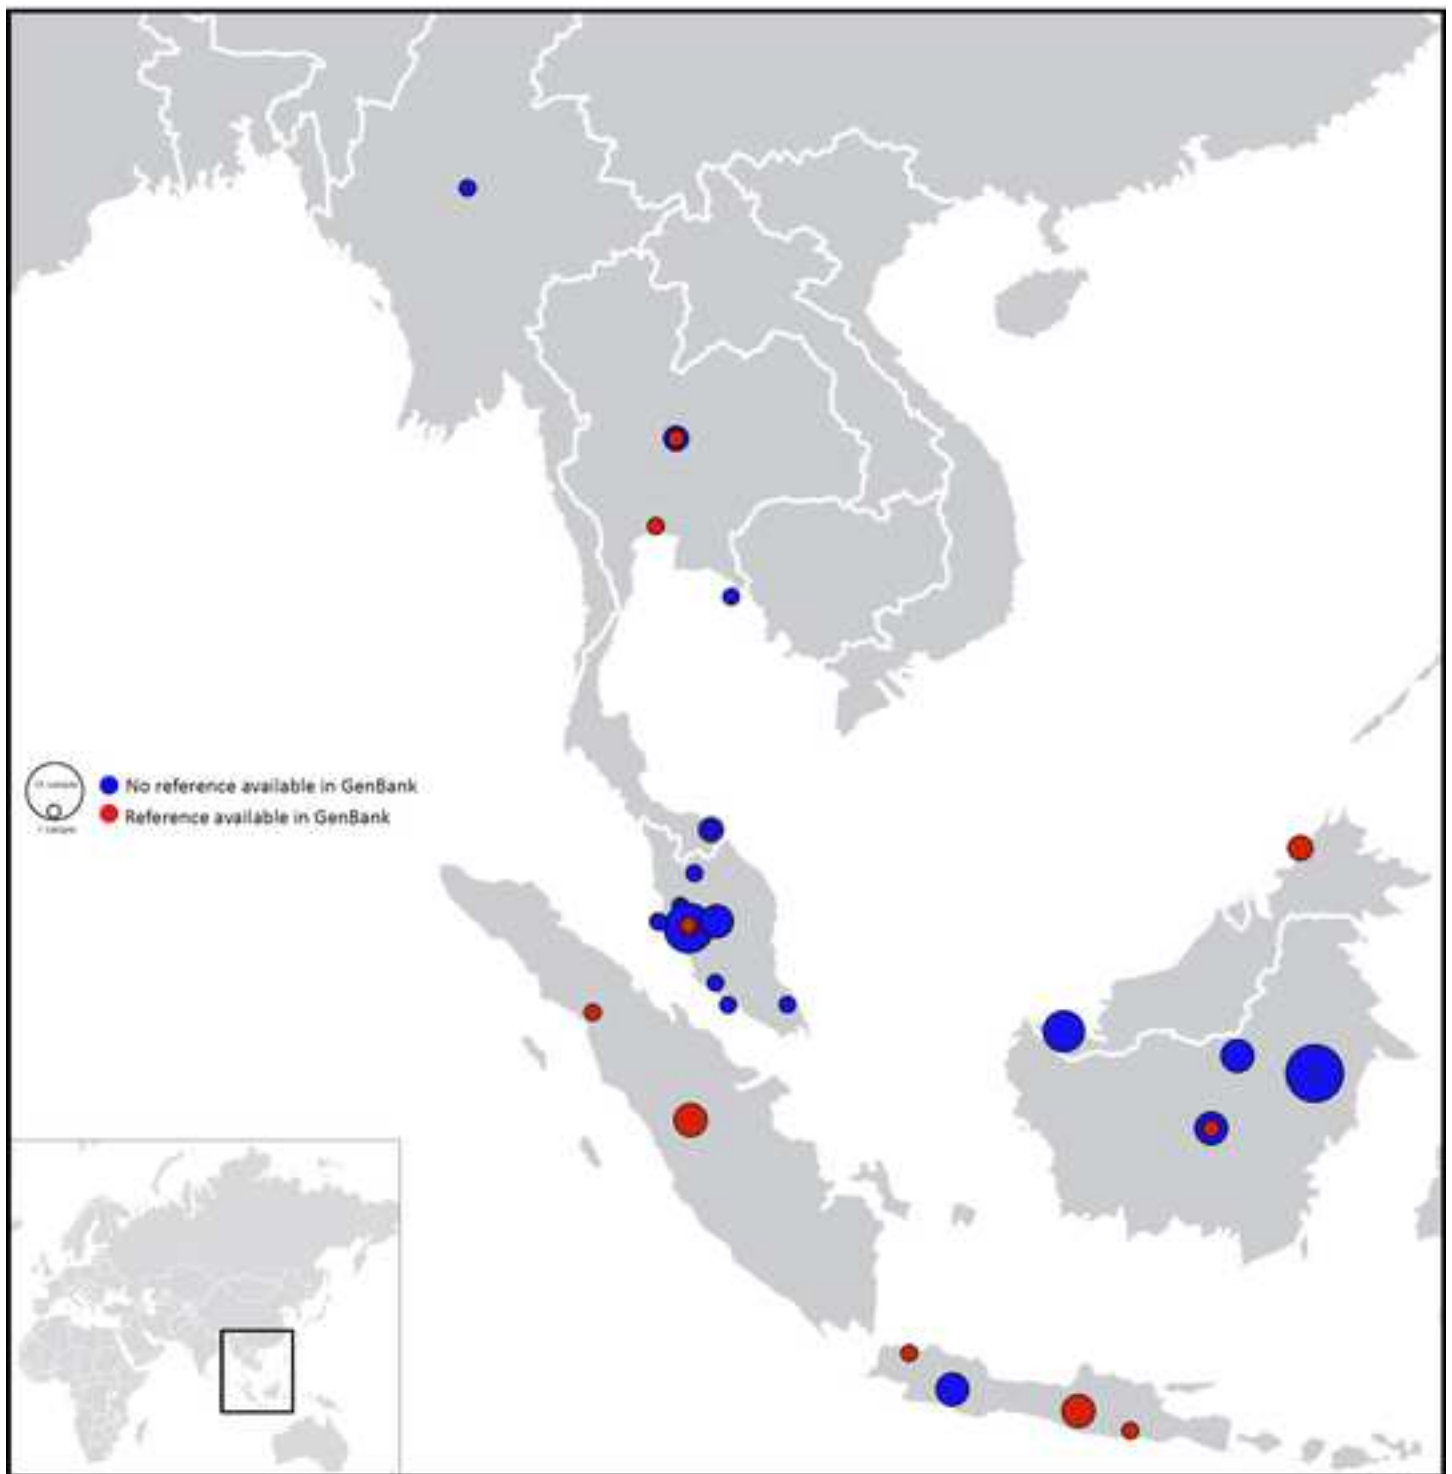



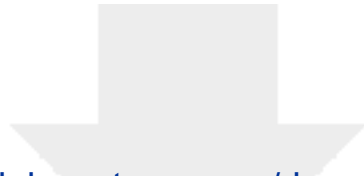

Click here to access/download  
**Supplementary Material**  
READMEsallehetal.txt

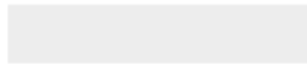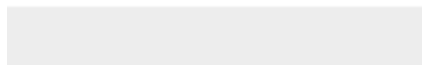

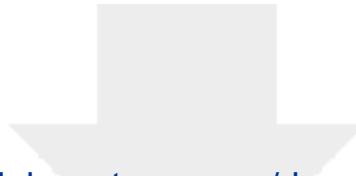

Click here to access/download

**Supplementary Material**

1DatainformationSallehetal.docx

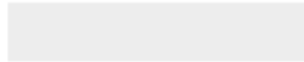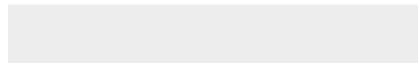

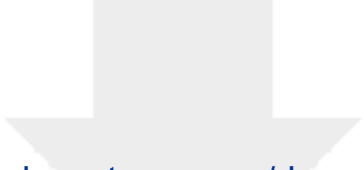

Click here to access/download  
**Supplementary Material**  
5 Additional file 2.xlsx



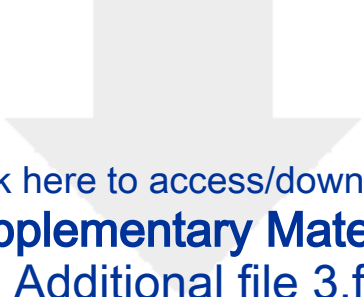

Click here to access/download  
**Supplementary Material**  
5 Additional file 3.fa



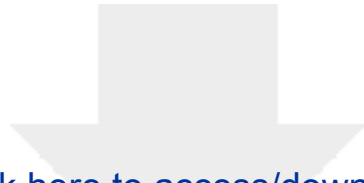

Click here to access/download  
**Supplementary Material**  
5 Additional file 4 newick.txt

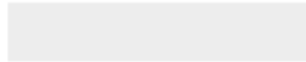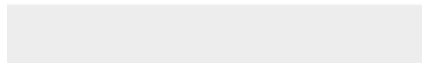

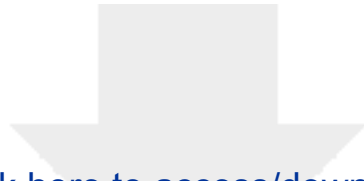

Click here to access/download  
**Supplementary Material**  
5Additional file 1.docx

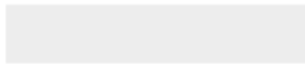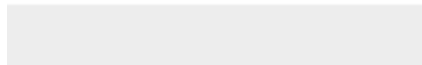



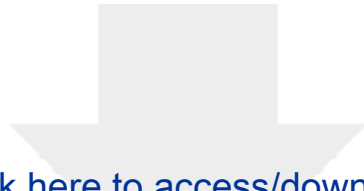

Click here to access/download  
**Supplementary Material**  
Correctionsforsubmissions.docx

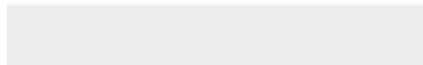

Supplement: gix053_giga-d-17-00015_revision-1.pdf [file gix053_giga-d-17-00015_revision-1.pdf]
