# Supplementary material for: An expanded mammal mitogenome dataset from Southeast Asia
Source: PubMed Central journal article supplement (PMC5737531; doi:10.1093/gigascience/gix053), 2017-07-13
Supplement: gix053_giga-d-17-00015_revision-2.pdf [file gix053_giga-d-17-00015_revision-2.pdf]

1  
2  
3  
4 **Title: An expanded mammal mitogenome dataset from Southeast Asia**

5  
6 Faezah Mohd Salleh<sup>1,2\*</sup>, Jazmín Ramos-Madrigal<sup>1</sup>, Fernando Peñaloza<sup>3,4</sup>, Shanlin Liu<sup>1,5</sup>, Mikkol-Holger S.  
7  
8 Sinding<sup>1,6</sup>, Riddhi P. Patel<sup>3,7</sup>, Renata Martins<sup>3</sup>, Dorina Lenz<sup>3</sup> Jörns Fickel<sup>3,8</sup>, Christian Roos<sup>9</sup>, Mohd Shahir  
9  
10 Shamsir<sup>2</sup>, Mohammad Shahfiz Azman<sup>10</sup>, Burton K. Lim<sup>11</sup>, Stephen J. Rossiter<sup>12</sup>, Andreas Wilting<sup>3</sup>, M.  
11  
12 Thomas P. Gilbert<sup>1,13\*</sup>

13  
14 \*Correspondence: [faezah@fbb.utm.my](mailto:faezah@fbb.utm.my) and [tgilbert@snm.ku.dk](mailto:tgilbert@snm.ku.dk)

15  
16  
17  
18 <sup>1</sup>Centre for GeoGenetics, Natural History Museum of Denmark, University of Copenhagen, Øster  
19  
20 Voldgade 5-7, 1350, Copenhagen, Denmark

21  
22 <sup>2</sup>Faculty of Biosciences and Medical Engineering, Universiti Teknologi Malaysia, 81310 Johor Bahru,  
23  
24 Johor, Malaysia

25  
26 <sup>3</sup>Leibniz Institute for Zoo and Wildlife Research, Alfred-Kowalke Strasse 17, 10315 Berlin, Germany.

27  
28 <sup>4</sup>Undergraduate Program on Genomic Sciences, Universidad Nacional Autonoma de Mexico, 62210  
29  
30 Cuernavaca, Mexico

31  
32 <sup>5</sup>BGI-Shenzhen, Shenzhen, GuangDong, China

33  
34 <sup>6</sup>Natural History Museum, University of Oslo, P.O. Box 1172 Blindern, NO-0318, Oslo, Norway

35  
36 <sup>7</sup>Freie Universität Berlin, Kaiserswerther Str. 16-18, 14195 Berlin, Germany

37  
38 <sup>8</sup>University of Potsdam, Institute for Biochemistry and Biology, Karl-Liebknecht-Str 24-25, 14476  
39  
40 Potsdam, Germany

41  
42 <sup>9</sup>Gene Bank of Primates and Primate Genetics Laboratory, German Primate Center, Leibniz Institute for  
43  
44 Primate Research, Kellnerweg 4, 37077, Göttingen, Germany

45  
46 <sup>10</sup>Forest Biodiversity Division, Forest Research Institute Malaysia, 52109 Kepong, Selangor, Malaysia.

47  
48 <sup>11</sup>Department of Natural History, Royal Ontario Museum, Toronto, Canada

49  
50 <sup>12</sup>School of Biological and Chemical Sciences, Queen Mary University of London, Mile End Road, London  
51  
52 E1 4NS, United Kingdom

53  
54 <sup>13</sup>NTNU University Museum, Norwegian University of Science and Technology, Trondheim, Norway

1  
2  
3  
4  
5  
6 **Abstract**

7  
8 **Background:**

9  
10 Southeast (SE) Asia is one of the most biodiverse regions in the world and it holds approximately 20% of  
11 all mammal species. Despite this, the majority of SE Asia's genetic diversity is still poorly characterised.

12  
13  
14 The growing interest in using environmental DNA (eDNA) to assess and monitor SE Asian species, in  
15 particular threatened mammals - has created the urgent need to expand the available reference database  
16 of mitochondrial barcode and complete mitogenome sequences. We have partially addressed this need  
17 by generating 72 new mitogenome sequences reconstructed from DNA isolated from a range of historical  
18 and modern tissue samples.  
19

20  
21  
22 **Findings:**

23  
24  
25  
26 Approximately 55 gigabases of raw sequence were generated. From this data we assembled 72 complete  
27 mitogenome sequences, with an average depth of coverage of 102.9x and 55.2x for modern samples and  
28 historical samples, respectively. This dataset represents 52 species, of which 30 species had no previous  
29 mitogenome data available. The mitogenomes were geotagged to their sampling location, where known,  
30 to display a detailed geographical distribution of the species.  
31

32  
33  
34 **Conclusion:**

35  
36  
37  
38 Our new database of 52 taxa will strongly enhance the utility of eDNA approaches for monitoring  
39 mammals in SE Asia, as it greatly increases the likelihoods that identification of metabarcoding  
40 sequencing reads can be assigned to reference sequences. This magnifies the confidence in species  
41 detections and thus allows more robust surveys and monitoring programmes of SE Asia's threatened  
42 mammal biodiversity. The extensive collections of historical samples from SE Asia in western and SE  
43 Asian museums should serve as additional valuable material to further enrich this reference database.  
44  
45  
46  
47  
48  
49

50  
51 **Keywords:**

52 invertebrate-derived (iDNA), metabarcoding, GenBank, Taxonomic assignment  
53  
54  
55  
56  
57  
58  
59  
60  
61  
62  
63  
64  
65

1  
2  
3  
4  
5  
6 **Data description:**  
7

8 **Context**  
9

10 Southeast (SE) Asia is one of the most biodiverse regions in the world, hosting ~20% of mammal species,  
11 but is experiencing rapid deforestation for agriculture and development. To assess the ecological  
12 consequences of land-use change, there is growing interest in using environmental DNA (eDNA) to  
13 monitor mammal populations, particularly threatened taxa that often underpin conservation policies [1–4].  
14 Yet current efforts are hampered by the lack of a reference database of mitochondrial barcodes and  
15 complete mitogenome sequences. Currently there are 922 mammalian mitogenomes available in  
16 Genbank. Unfortunately most are not tagged by location/origin. Data mining through manual screening of  
17 each mitogenomes resulted in 174 terrestrial mammal species which are typical to SE Asia. In this work,  
18 30 novel species are added, contributing to ~17% expansion of the current SE Asia mammal mitogenome  
19 database.  
20  
21  
22  
23  
24  
25  
26  
27  
28  
29  
30  
31

32 **DNA extraction**  
33

34 Genomic DNA was extracted from different sample types of 72 small mammals, comprising 52 species,  
35 listed in Table 1 and Table 2. DNA from modern tissue and blood samples was isolated using the Qiagen  
36 DNeasy extraction kit (Qiagen, Hilden, Germany, [QIAGEN, RRID:SCR\_008539]) or Invitex DNA  
37 extraction kit (Invitex GmbH, Berlin, Germany), as per standard protocols following the manufacturer's  
38 guidelines. Historical samples obtained from the Zoological Museum, Natural History Museum of  
39 Denmark, University of Copenhagen (ZM, KU) were treated differently according to type of tissue  
40 (Additional file 1a), while at the German Primate Center DNA extraction from museum specimens  
41 followed Liedigk et al. (2015) [5] using the Gen-IAL First All tissue kit (Gen-IAL, Troisdorf, Germany).  
42 Complete details of sample information are provided in Additional file 2.  
43  
44  
45  
46  
47  
48  
49  
50  
51  
52  
53  
54

55 **Data Validation and Quality Control**  
56

57 **Mitogenome sequencing, assembly and annotation**  
58

59 Mitogenomes were generated using several approaches. In Copenhagen, author FMS constructed  
60  
61  
62  
63  
64  
65

1  
2  
3  
4 Illumina shotgun libraries with insert sizes ranging between 50 bp to 400 bp. To construct libraries, DNA  
5  
6 was sheared to the target size range using Bioruptor® XL (Diagenode, USA [Diagenode,  
7  
8 RRID:SCR\_014807]) and converted into an Illumina-compatible sequencing library using the NEBNext  
9  
10 E6070 kit (New England Biolabs, UK). The libraries were PCR amplified with index primers and purified  
11  
12 using Qiaquick columns (Qiagen, Hilden, Germany) according to the manufacturer's instruction  
13  
14 (Additional file 1b). Multiple libraries were combined together into three pools, normalized to 10 nM and  
15  
16 sequenced across three lanes of Illumina HiSeq 2500 using SR100bp chemistry. In Berlin and  
17  
18 Goettingen, mitogenomes were generated by author PRP and CR using overlapping PCR products using  
19  
20 long range PCR (Additional file 1c) followed by library construction and MiSeq sequencing, or Sanger  
21  
22 sequencing as described in [6] and [5, 7, 8], respectively. Author RM's mitogenomes were done using  
23  
24 methods outlined in [9]. Further details about laboratory methods are described in Additional file 1.  
25  
26  
27  
28  
29

30  
31 Raw reads for FMS samples were assembled independently by authors FMS and FP using two different  
32  
33 approaches, then compared for consistency. Author FMS trimmed the reads for sequencing adapters, low  
34  
35 quality stretches and leading/trailing Ns using AdapterRemoval 1.2 (AdapterRemoval,  
36  
37 RRID:SCR\_011834) [10]. The mitochondrial genome was reconstructed with MITObim v1.8 [11] using the  
38  
39 reference mitogenome of the closest species available in GenBank as the seed reference (Additional file  
40  
41 2). In order to obtain the mapping statistics of the samples, we ran PALEOMIX v 1.2.6 [12] with default  
42  
43 parameters where reads shorter than 25 bp after trimming were discarded. The trimmed reads were  
44  
45 aligned against the newly assembled mitogenome generated by MITObim using Burrows–Wheeler  
46  
47 Aligner (BWA) [13]. Alignments showing low-quality scores and PCR duplicates were further removed  
48  
49 using the MarkDuplicates program from Picard tools, and reads were locally realigned around small  
50  
51 insertions and deletions (indels) to improve overall genome quality using the IndelRealigner tool from the  
52  
53 Genome Analysis Toolkit (GATK), (GATK, RRID:SCR\_001876 ) [14]. In contrast, author FP inputted  
54  
55 the trimmed reads into mitoMaker [15] which performs a de-novo and reference-based assembly using  
56  
57 SOAPdenovoTrans v1.03 (SOAPdenovo-Trans, RRID:SCR\_013268) [16] and MITObim v1.7 [11]. Post  
58  
59  
60  
61  
62  
63  
64  
65

1  
2  
3  
4 assembly, the FMS and FP mitogenomes were manually compared for consistency by FMS to generate  
5  
6 the final consensus sequences. These assemblies were automatically annotated using tRNAscan-SE  
7  
8 v1.4 (tRNAscan-SE, RRID:SCR\_010835) [17] and BLAST v2.2.29 (NCBI BLAST, RRID:SCR\_004870)  
9  
10 [18] using the mitochondrial genomes found in the NCBI RefSeq (RefSeq, RRID:SCR\_003496) [19] as  
11  
12 references.  
13

14  
15  
16 For mitogenome constructed by author RM, Illumina sequence reads were de-multiplexed according to  
17  
18 the respective indexes with the Illumina software bcl2fastq v2.17 (Illumina, San Diego, CA, USA) and  
19  
20 adapters were clipped from the sequence reads with the software cutadapt v1.3 [20]. Quality trimming  
21  
22 was done through a sliding window approach (10 bp; Q20) and all reads shorter than 20 bp were  
23  
24 removed from the analyses. Mitogenome references from target or closely related species were used for  
25  
26 mapping of the sequencing reads. Aligned reads were de-duplicated using MarkDuplicates from Picard-  
27  
28 tools v1.106 (Picard, RRID:SCR\_006525) (<https://github.com/broadinstitute/picard>). VariantCalling was  
29  
30 carried out using Samtools v1.1 (SAMTOOLS, RRID:SCR\_002105)[13] and Bcftools v1.2  
31  
32 (SAMtools/BCFtools, RRID:SCR\_005227 ) [21] For each sample, GATK [14] Variant Calling output files  
33  
34  
35 were further filtered to have a minimum read coverage  $\geq 3x$ , and variants were only called when the  
36  
37  
38 corresponding base was represented by  $\geq 50\%$ , otherwise this position was "N"-masked.  
39  
40  
41

42  
43  
44 Numbers of raw reads generated for each samples and mapping statistics for all 72 mitogenome  
45  
46 assemblies are shown in Additional file 2. Sanger sequenced mitogenomes were checked with 4Peaks  
47  
48 1.8 (4Peaks, RRID:SCR\_000015) [22], assembled with SeaView 4.5.4 [23] and annotated with DOGMA  
49  
50 [24]. All mitogenomes were checked manually by eye to identify possible errors caused by insertion and  
51  
52 deletions in Tablet [25]. The final mitochondrial genomes have been uploaded to GenBank (accession  
53  
54 numbers are provided in Table 1 and Table 2). The details of all new mitogenomes assembled in this  
55  
56 work are given in Table 1 and Table 2. Mitogenomes (60 samples) with known localities were geotagged  
57  
58 and mapped to display its geographical distribution (Figure 1).  
59  
60  
61  
62  
63  
64  
65

1  
2  
3  
4  
5  
6 **Phylogenetic analysis**  
7

8 All the sequenced mitogenomes were aligned using MAFFT v7.158b (MAFFT, RRID:SCR\_011811) [26],  
9  
10 using the E-INS-i option (Additional file 3). RAxML v8.0.26 (RAxML, RRID:SCR\_006086) [27] was used to  
11  
12 perform the phylogenetic analysis with a GTR+GAMMA model of nucleotide substitution. To obtain node  
13  
14 support, we used 100 bootstrap pseudo-replicates (Figure 2). The newick file is provided as Additional file  
15  
16 4.  
17  
18  
19

20 **Re-use Potential**  
21

22 We anticipate that the now expanded mitogenome reference dataset for SE Asian mammals will provide  
23  
24 benefits for a number of research areas. Firstly it should enhance the power of eDNA and other  
25  
26 metabarcoding/barcoding approaches that relate to the identification of SE asian mammals, by conferring  
27  
28 the ability to identify more species to the species level. This in turn has practical applications for those  
29  
30 monitoring SE Asia's threatened mammal biodiversity, combatting trade in mammal species and so on.  
31  
32 Secondly the data will also have relevance to phylogenetic and population studies based on mtDNA data,  
33  
34 which will be of use as we investigate the evolutionary history of this biodiversity hotspot.  
35  
36  
37  
38

39 **Availability of supporting data**  
40

41 Raw shotgun data are deposited in the SRA under bioproject number PRJNA361218 and is available in the  
42  
43 GigaScience repository, GigaDB [28].  
44  
45

46 **Abbreviations**  
47

48 SE: South East; eDNA: environmental deoxyribonucleic acid; bp: basepair; PCR: polymerase chain  
49  
50 reaction; BWA: Burrows–Wheeler Aligner; GATK: Genome Analysis Toolkit; BLAST: Basic Local  
51  
52 Alignment Search Tool; NCBI RefSeq: National Center for Biotechnology Information Reference  
53  
54 Sequence Database; MAFFT: Multiple Alignment using Fast Fourier Transform ; RAxML: Randomized  
55  
56 Axelerated Maximum Likelihood.  
57  
58  
59  
60  
61  
62  
63  
64  
65

1  
2  
3  
4 **Competing interests**

5  
6 The authors declare that they have no competing interests.  
7  
8  
9

10 **Funding**

11  
12 This project was funded by the Malaysian Government (FMS), Lundbeck Foundation grant R52-5062  
13 (MTPG), Leibniz-Association grant SAW-2013-IZW-2 (JF), the German Federal Ministry of Education and  
14 Research grant BMBF FKZ: 01LN1301A (AW) and the German Primate Center (CR).  
15  
16  
17  
18  
19

20 **Authors' contributions**

21  
22 FMS, AW, JF and MTPG conceived the project. FMS, MHSS, MSS, MSA, RM, PRP, CR, BKL, and SJR  
23 collected the samples and extracted the genomic DNA. FMS, RM, PRP and CR constructed the libraries  
24 and did sequencing. FMS, JRM, FP, SL, PRP, RM, DL and CR assembled the mitogenomes and  
25 performed mitogenome analysis. FMS, SL, PRP and MTPG wrote the article. All authors discussed the  
26 project and data. All authors read and approved the final manuscript.  
27  
28  
29  
30  
31  
32  
33  
34

35 **Acknowledgements**

36  
37 We thank the Danish National High-throughput Sequencing Centre for assistance in generating Illumina  
38 data. We also thank the staff of the zoos in Hannover, Copenhagen, Gettorf, Belfast, Bristol, Howletts  
39 Wild Animal Park, the staff of the Ludwig-Maximilians-University Munich, the Bavarian State Collection  
40 Munich, the National Museums Scotland, Edinburgh, the Natural History Museum Berlin, Naturalis  
41 Leiden, and the Zoological Museum, Natural History Museum of Denmark, University of Copenhagen for  
42 providing samples for this work. BKL gratefully acknowledges the Indonesian and Malaysian government  
43 authorities for issuing scientific permits.  
44  
45  
46  
47  
48  
49  
50  
51  
52  
53  
54  
55  
56  
57  
58

59 **Author details**

1  
2  
3  
4  
5  
6  
7  
8  
9  
10  
11  
12  
13  
14  
15  
16  
17  
18  
19  
20  
21  
22  
23  
24  
25  
26  
27  
28  
29  
30  
31  
32  
33  
34  
35  
36  
37  
38  
39  
40  
41  
42  
43  
44  
45  
46  
47  
48  
49  
50  
51  
52  
53  
54  
55  
56  
57  
58  
59  
60  
61  
62  
63  
64  
65

<sup>1</sup>Centre for GeoGenetics, Natural History Museum of Denmark, University of Copenhagen, Øster Voldgade 5-7, 1350, Copenhagen, Denmark. <sup>2</sup>Faculty of Biosciences and Medical Engineering, Universiti Teknologi Malaysia, 81310 Johor Bahru, Johor, Malaysia. <sup>3</sup>Leibniz Institute for Zoo and Wildlife Research, Alfred-Kowalke Strasse 17, 10315 Berlin, Germany. <sup>4</sup>Undergraduate Program on Genomic Sciences, Universidad Nacional Autonoma de Mexico, 62210 Cuernavaca, Mexico. <sup>5</sup>BGI-Shenzhen, Shenzhen, Guangdong, China. <sup>6</sup>Natural History Museum, University of Oslo, P.O. Box 1172 Blindern, NO-0318, Oslo, Norway. <sup>7</sup>Freie Universität Berlin, Kaiserswerther Str. 16-18, 14195 Berlin, Germany. <sup>8</sup>University of Potsdam, Institute for Biochemistry and Biology, Karl-Liebknecht-Str 24-25, 14476 Potsdam, Germany. <sup>9</sup>Gene Bank of Primates and Primate Genetics Laboratory, German Primate Center, Leibniz Institute for Primate Research, Kellnerweg 4, 37077, Göttingen, Germany. <sup>10</sup>Forest Biodiversity Division, Forest Research Institute Malaysia, 52109 Kepong, Selangor, Malaysia. <sup>11</sup>Department of Natural History, Royal Ontario Museum, Toronto, Canada. <sup>12</sup>School of Biological and Chemical Sciences, Queen Mary University of London, Mile End Road, London E1 4NS, United Kingdom. <sup>13</sup>NTNU University Museum, Norwegian University of Science and Technology, Trondheim, Norway.



## References

1. Bohmann K, Evans A, Gilbert MTP, Carvalho GR, Creer S, Knapp M, Yu DW, de Bruyn M (2014) Environmental DNA for wildlife biology and biodiversity monitoring. *Trends Ecol Evol* 29:358–367
2. Lee P-S, Gan HM, Clements GR, Wilson J-J (2016) Field calibration of blowfly-derived DNA against traditional methods for assessing mammal diversity in tropical forests. *Genome* 59:1008–1022
3. Schnell IB, Sollmann R, Calvignac-Spencer S, Siddall ME, Douglas WY, Wilting A, Gilbert MTP (2015) iDNA from terrestrial haematophagous leeches as a wildlife surveying and monitoring tool--prospects, pitfalls and avenues to be developed. *Front Zool* 12:24
4. Schnell IB, Thomsen PF, Wilkinson N, Rasmussen M, Jensen LRD, Willerslev E, Bertelsen MF, Gilbert MTP (2012) Screening mammal biodiversity using DNA from leeches. *Curr Biol* 22:R262–3
5. Liedigk R, Kolleck J, Böker KO, et al (2015) Mitogenomic phylogeny of the common long-tailed macaque (*Macaca fascicularis fascicularis*). *BMC Genomics* 16:222
6. Patel RP, Förster DW, Kitchener AC, et al (2016) Two species of Southeast Asian cats in the genus *Catopuma* with diverging histories: an island endemic forest specialist and a widespread habitat generalist. *Open Science* 3:160350
7. Roos C, Zinner D, Kubatko LS, et al (2011) Nuclear versus mitochondrial DNA: evidence for hybridization in colobine monkeys. *BMC Evol Biol* 11:77
8. Liedigk R, Roos C, Brameier M, Zinner D (2014) Mitogenomics of the Old World monkey tribe Papionini. *BMC Evol Biol* 14:176
9. Fortes GG, Paijmans JLA (2015) Analysis of Whole Mitogenomes from Ancient Samples. *Methods Mol Biol* 1347:179–195
10. Lindgreen S (2012) AdapterRemoval: easy cleaning of next-generation sequencing reads. *BMC Res Notes* 5:337
11. Hahn C, Bachmann L, Chevreur B (2013) Reconstructing mitochondrial genomes directly from genomic next-generation sequencing reads—a baiting and iterative mapping approach. *Nucleic Acids Res.*
12. Schubert M, Ermini L, Der Sarkissian C, et al (2014) Characterization of ancient and modern genomes by SNP detection and phylogenomic and metagenomic analysis using PALEOMIX. *Nat Protoc* 9:1056–1082
13. Li H, Durbin R (2009) Fast and accurate short read alignment with Burrows–Wheeler transform. *Bioinformatics* 25:1754–1760
14. McKenna A, Hanna M, Banks E, et al (2010) The Genome Analysis Toolkit: a MapReduce framework for analyzing next-generation DNA sequencing data. *Genome Res* 20:1297–1303
15. mitoMaker. <https://sourceforge.net/projects/mitomaker/>. Accessed 26 May 2017
16. Xie Y, Wu G, Tang J, et al (2014) SOAPdenovo-Trans: de novo transcriptome assembly with short RNA-Seq reads. *Bioinformatics* 30:1660–1666
17. Lowe TM, Eddy SR (1997) tRNAscan-SE: a program for improved detection of transfer RNA genes in genomic sequence. *Nucleic Acids Res* 25:955–964

- 1
- 2
- 3
- 4 18. Camacho C, Coulouris G, Avagyan V, Ma N, Papadopoulos J, Bealer K, Madden TL (2009) BLAST+:  
5 architecture and applications. *BMC Bioinformatics* 10:421
- 6
- 7 19. RefSeq: NCBI Reference Sequence Database. <https://www.ncbi.nlm.nih.gov/refseq>. Accessed 26  
8 May 2017
- 9
- 10 20. Martin M (2011) Cutadapt removes adapter sequences from high-throughput sequencing reads.  
11 *EMBnet.journal* 17:10–12
- 12
- 13 21. bcftools. <https://github.com/samtools/bcftools>. Accessed 26 May 2017
- 14
- 15 22. Nucleobytes: software for science. <http://nucleobytes.com>. Accessed 26 May 2017
- 16
- 17 23. Gouy M, Guindon S, Gascuel O (2010) SeaView version 4: A multiplatform graphical user interface  
18 for sequence alignment and phylogenetic tree building. *Mol Biol Evol* 27:221–224
- 19
- 20 24. Wyman SK, Jansen RK, Boore JL (2004) Automatic annotation of organellar genomes with DOGMA.  
21 *Bioinformatics* 20:3252–3255
- 22
- 23 25. Milne I, Stephen G, Bayer M, Cock PJA, Pritchard L, Cardle L, Shaw PD, Marshall D (2012) Using  
24 Tablet for visual exploration of second-generation sequencing data. *Brief Bioinform* bbs012
- 25
- 26 26. Katoh K, Standley DM (2013) MAFFT multiple sequence alignment software version 7: improvements  
27 in performance and usability. *Mol Biol Evol* 30:772–780
- 28
- 29 27. Stamatakis A (2014) RAxML version 8: a tool for phylogenetic analysis and post-analysis of large  
30 phylogenies. *Bioinformatics* 30:1312–1313
- 31
- 32 28. Salleh FM, Ramos-Madriral J, Penaloza F, Liu S, Sinding MS, Patel RP, Martins R, Lenz D, Fickel J,  
33 Roos C, Shamsir MS, Azman MS, Lim BK, Rossiter SJ, Wilting A, Gilbert MP. Supporting data for "An  
34 expanded mammal mitogenome dataset from Southeast Asia" GigaScience Database. 2017.  
35 <http://dx.doi.org/10.5524/100313>
- 36
- 37
- 38
- 39
- 40
- 41
- 42
- 43
- 44
- 45

## 46 **Tables and Figures**

- 47
- 48 1. Table 1: List of mitogenomes assembled in this work that supplement pre-existing mitogenome  
49 references already available in GenBank
- 50
- 51
- 52 2. Table 2: List of mitogenomes assembled in this work that have no previous complete mitogenome  
53 reference available in GenBank
- 54
- 55
- 56 3. Figure 1: Geographical distribution of mitogenomes assembled in this work (60 mitogenomes with  
57 known locality)
- 58
- 59
- 60
- 61
- 62
- 63
- 64
- 65

1  
2  
3  
4  
5  
6  
7  
8  
9  
10  
11  
12  
13  
14  
15  
16  
17  
18  
19  
20  
21  
22  
23  
24  
25  
26  
27  
28  
29  
30  
31  
32  
33  
34  
35  
36  
37  
38  
39  
40  
41  
42  
43  
44  
45  
46  
47  
48  
49  
50  
51  
52  
53  
54  
55  
56  
57  
58  
59  
60  
61  
62  
63  
64  
65

4. Figure 2: Phylogenetic tree of mitogenomes assembled in this work

**Additional files**

1. Additional file 1: DNA extraction of historical samples, library construction and primer information
2. Additional file 2: Sample information sheet of mitogenomes assembled in this work
3. Additional file 3: Alignment of mitogenomes assembled in this work
4. Additional file 4: Newick file for phylogenetic tree

**Table 1: List of mitogenomes assembled in this work that supplement pre-existing mitogenome references already available in GenBank**

| No | GenBank ID | Common name                   | Genus               | Species                   | Assembly Size | Locality                                   | Source                                                    | Sample date of collection | Data by |
|----|------------|-------------------------------|---------------------|---------------------------|---------------|--------------------------------------------|-----------------------------------------------------------|---------------------------|---------|
| 1  | KY117537   | Hog deer                      | <i>Axis</i>         | <i>porcinus</i>           | 16402         | CPH Zoo                                    | ZM, KU                                                    | 21/8/1912                 | FMS/FP  |
| 2  | KY117538   | Pallas's squirrel             | <i>Callosciurus</i> | <i>erythraeus</i>         | 16656         | Bangkok, Thailand                          | ZM, KU                                                    | 25/5/1969                 | FMS/FP  |
| 3  | KX265095   | Bay Cat                       | <i>Catopuma</i>     | <i>badia</i>              | 16960         | Sabah, Malaysia                            | National Museum Scotland                                  | 20/04/2000                | PRP     |
| 4  | KX224524   | Asiatic Golden Cat            | <i>Catopuma</i>     | <i>temminckii</i>         | 16,960        | Thailand                                   | American Museum of National History, New York.            | 10/10/1927                | PRP     |
| 5  | KY117545   | Sumatran Rhino                | <i>Dicerorhinus</i> | <i>sumatrensis</i>        | 16466         | Sumatra, Indonesia                         | Naturalis, Leiden, The Netherlands                        | 1880                      | RM      |
| 6  | KY117546   | Least pygmy squirrel          | <i>Exilisciurus</i> | <i>exilis</i>             | 16637         | Indonesia                                  | ROM                                                       | 16/06/1993                | FMS/FP  |
| 7  | KY117548   | Hose's mongoose               | <i>Herpestes</i>    | <i>javanicus</i>          | 16340         | Java, Indonesia                            | ZM, KU                                                    | 12/3/1947                 | FMS/FP  |
| 8  | KY117550   | Three-striped ground Squirrel | <i>Lariscus</i>     | <i>indsignis</i>          | 16399         | Maybe Malaysia                             | ZM, KU                                                    | unknown                   | FMS/FP  |
| 9  | KY117592   | Black Crested Macaque         | <i>Macaca</i>       | <i>nigra</i>              | 16558         | captive                                    | Gettorf Zoo, Germany                                      | 18/07/2000                | CR      |
| 10 | KY117593   | Northern Pig-tailed Macaque   | <i>Macaca</i>       | <i>leonina</i>            | 16554         | captive                                    | Ludwig-Maximilians-University Munich, Germany             | 6/3/1995                  | CR      |
| 11 | KY117594   | Southern pig-tailed macaque   | <i>Macaca</i>       | <i>nemestrina</i>         | 16531         | Peninsular Malaysia                        | National Museum Scotland, Edinburgh, UK                   | unknown                   | CR      |
| 12 | KT288227   | Marbled Cat                   | <i>Pardofelis</i>   | <i>marmorata</i>          | 17218         | Sumatra, Indonesia                         | National Archaeological Museum of the Netherlands, Leiden | 30/08/1930                | PRP     |
| 13 | KY117602   | Sumatra Surili                | <i>Presbytis</i>    | <i>melalophos</i>         | 16558         | captive                                    | Howletts Wild Animal Park, UK                             | 23/7/1999                 | CR      |
| 14 | KR135743   | Flat-headed Cat               | <i>Prionailurus</i> | <i>planiceps</i>          | 17704         | Sabah, Malaysia                            | Sabah wildlife department                                 | 25/04/2000                | PRP     |
| 15 | KY117580   | Malayan Field Rat             | <i>Rattus</i>       | <i>tiomanicus</i>         | 16415         | SPF Bidor, Perak, Malaysia                 | FRIM                                                      | 12/2/2011                 | FMS/FP  |
| 16 | KY117579   | Malayan Field Rat             | <i>Rattus</i>       | <i>tiomanicus</i>         | 16312         | Indonesia                                  | ROM                                                       | 01/06/1993                | FMS/FP  |
| 17 | KY117581   | Malayan Field Rat             | <i>Rattus</i>       | <i>tiomanicus</i>         | 16305         | Hutan Simpan Chikus, Tapah Perak, Malaysia | FRIM                                                      | 13/1/2011                 | FMS/FP  |
| 19 | KY117582   | Black Giant Squirrel          | <i>Ratufa</i>       | <i>bicolor peninsulae</i> | 16600         | Bang Nara, Malakka, Thailand               | ZM, KU                                                    | 3/12/1932                 | FMS/FP  |

|    |          |                                   |                       |                             |       |                                                |                                                    |           |        |
|----|----------|-----------------------------------|-----------------------|-----------------------------|-------|------------------------------------------------|----------------------------------------------------|-----------|--------|
| 18 | KY117574 | Javan Rhino                       | <i>Rhinoceros</i>     | <i>sondaicus</i>            | 16417 | Java,<br>Indonesia                             | Copenhagen<br>Natural<br>History<br>Museum         | unknown   | RM     |
| 20 | KY117575 | Javan Rusa                        | <i>Rusa</i>           | <i>timorensis</i>           | 16437 | Toeloeng<br>Agoeng, West<br>Java,<br>Indonesia | Naturalis,<br>Leiden, The<br>Netherlands           | unknown   | RM     |
| 21 | KY117576 | Indian Sambar<br>Deer             | <i>Rusa</i>           | <i>unicolor<br/>dejeani</i> | 16437 | Mentawai,<br>Indonesia                         | Naturalis,<br>Leiden, The<br>Netherlands           | unknown   | RM     |
| 22 | KY117599 | Western<br>Purple-faced<br>Langur | <i>Semnopithecus</i>  | <i>vetulus</i>              | 16545 | captive                                        | Belfast Zoo,<br>UK                                 | 9/11/1998 | CR     |
| 23 | KY117589 | Malayan Tapir                     | <i>Tapirus</i>        | <i>indicus</i>              | 16794 | captive                                        | Copenhagen<br>Zoo                                  | 11/1/2015 | FMS/FP |
| 24 | KY117598 | Silvered<br>Langur                | <i>Trachypithecus</i> | <i>cristatus</i>            | 16551 | North<br>Sumatra,<br>Indonesia                 | Bavarian State<br>Collection<br>Munich,<br>Germany | 1911      | CR     |

---

ZM, KU: Zoological Museum, University of Copenhagen; ROM: Royal Ontario Museum; FRIM: Forest Research Institute, Malaysia

**Table 2: List of mitogenomes assembled in this work that have no previous complete mitogenome reference available in GenBank**

| No | GenBank ID | Common name              | Genus               | Species                      | Assembly Size | Locality                                       | Source                                    | Sample date of collection | Data by |
|----|------------|--------------------------|---------------------|------------------------------|---------------|------------------------------------------------|-------------------------------------------|---------------------------|---------|
| 1  | KY117536   | Asian Small-clawed Otter | <i>Aonyx</i>        | <i>cinereus</i>              | 16153         | captive                                        | Copenhagen Zoo                            | 08/08/11                  | FMS/FP  |
| 2  | KY117535   | Asian Small-clawed Otter | <i>Aonyx</i>        | <i>cinereus</i>              | 16153         | Sarawak, Malaysia                              | British Museum of Natural History, London | 25/8/2010                 | FMS/FP  |
| 3  | KY117560   | Binturong                | <i>Arctictis</i>    | <i>binturong</i>             | 17067         | unknown                                        | Tierpark, Berlin                          | 29/11/2010                | PRP     |
| 4  | KY117541   | Plantain Squirrel        | <i>Callosciurus</i> | <i>notatus</i>               | 16582         | Hutan Bidor, Perak, Malaysia                   | FRIM                                      | 11/2/2011                 | FMS/FP  |
| 5  | KY117542   | Plantain squirrel        | <i>Callosciurus</i> | <i>notatus</i>               | 16599         | East Kalimantan, Indonesia                     | ROM                                       | 03/06/1993                | FMS/FP  |
| 6  | KY117543   | Prevost's squirrel       | <i>Callosciurus</i> | <i>prevostii</i>             | 16674         | East Kalimantan, Indonesia                     | ROM                                       | 15/06/1993                | FMS/FP  |
| 7  | KY117540   | Variable squirrel        | <i>Callosciurus</i> | <i>finlaysonii frandseni</i> | 15747         | Koh Chang, Thailand                            | ZM, KU                                    | 14/1/1900                 | FMS/FP  |
| 8  | KY117539   | Variable squirrel        | <i>Callosciurus</i> | <i>finlaysonii</i>           | 16489         | Central Thailand                               | ZM, KU                                    | 2/2/1928                  | FMS/FP  |
| 9  | KY117544   | Sunda Otter Civet        | <i>Cynogale</i>     | <i>bennetti</i>              | 15784         | Borneo                                         | British Museum of Natural History, London | 25/8/2010                 | FMS/FP  |
| 10 | KY117549   | Greater Mouse deer       | <i>Tragulus</i>     | <i>napu</i>                  | 15778         | Bang Nara, Thailand                            | ZM, KU                                    | 11/10/1931                | FMS/FP  |
| 11 | KY117552   | Long-tailed Giant Rat    | <i>Leopoldamys</i>  | <i>sabanus</i>               | 15973         | G. Telapak Buruk, Negeri Sembilan, Malaysia    | FRIM                                      | 24/2/2010                 | FMS/FP  |
| 12 | KY117553   | Long-tailed Giant Rat    | <i>Leopoldamys</i>  | <i>sabanus</i>               | 15972         | Teluk Segadas, P. Pangkor, Perak, Malaysia     | FRIM                                      | 19/3/2010                 | FMS/FP  |
| 13 | KY117554   | Long-tailed Giant Rat    | <i>Leopoldamys</i>  | <i>sabanus</i>               | 15974         | Hutan Simpan Temengor, Gerik Perak, Malaysia   | FRIM                                      | 23/1/2014                 | FMS/FP  |
| 14 | KY117555   | Long-tailed Giant Rat    | <i>Leopoldamys</i>  | <i>sabanus</i>               | 15972         | Hutan Simpan Lenggong, Kluang, Johor, Malaysia | FRIM                                      | 19/2/2014                 | FMS/FP  |
| 15 | KY117551   | Long-tailed giant rat    | <i>Leopoldamys</i>  | <i>sabanus</i>               | 15974         | Malaysia                                       | ROM                                       | 28/05/1993                | FMS/FP  |
| 16 | KY117556   | Hairy-nosed otter        | <i>Lutra</i>        | <i>sumatrana</i>             | 16580         | Bang Nara, Thailand                            | ZM, KU                                    | 1/4/1939                  | FMS/FP  |
| 17 | KY117557   | Smooth-coated otter      | <i>Lutrogale</i>    | <i>perspicillata</i>         | 16042         | Melaka, Malaysia                               | British Museum of Natural History, London | 25/8/2010                 | FMS/FP  |

|    |          |                        |                     |                      |       |                                                 |                                                |            |        |
|----|----------|------------------------|---------------------|----------------------|-------|-------------------------------------------------|------------------------------------------------|------------|--------|
| 18 | KY117558 | Smooth-coated otter    | <i>Lutrogale</i>    | <i>perspicillata</i> | 16041 | Bang Nara, Thailand                             | ZM, KU                                         | 24/1/1933  | FMS/FP |
| 19 | KY117591 | Moor macaque           | <i>Macaca</i>       | <i>maura</i>         | 16563 | captive                                         | Hannover Zoo, Germany                          | 20/8/1998  | CR     |
| 20 | KY117564 | Rajah/Brown Spiny Rat  | <i>Maxomys</i>      | <i>rajah</i>         | 16200 | Indonesia                                       | ROM                                            | 06/06/1993 | FMS/FP |
| 21 | KY117562 | Rajah/Brown Spiny Rat  | <i>Maxomys</i>      | <i>rajah</i>         | 16296 | Teluk Segadas, P. Pangkor, Perak, Malaysia      | FRIM                                           | 19/3/2010  | FMS/FP |
| 22 | KY117563 | Rajah/Brown Spiny Rat  | <i>Maxomys</i>      | <i>rajah</i>         | 16296 | Pasir Bogak, P. Pangkor, Perak, Malaysia        | FRIM                                           | 18/3/2010  | FMS/FP |
| 23 | KY117567 | Red Spiny Rat          | <i>Maxomys</i>      | <i>surifer</i>       | 16286 | 50 ha, Pasoh, Negeri Sembilan, Malaysia         | FRIM                                           | 12/6/2008  | FMS/FP |
| 24 | KY117566 | Red Spiny Rat          | <i>Maxomys</i>      | <i>surifer</i>       | 16290 | Indonesia                                       | ROM                                            | 21/05/1993 | FMS/FP |
| 25 | KY117565 | Red Spiny Rat          | <i>Maxomys</i>      | <i>surifer</i>       | 16286 | Malaysia                                        | ROM                                            | 17/05/2013 | FMS/FP |
| 26 | KY117570 | Whitehead's Spiny Rat  | <i>Maxomys</i>      | <i>whiteheadi</i>    | 16316 | Hutan Simpan Bikam, Perak, Malaysia             | FRIM                                           | 12/2/2011  | FMS/FP |
| 27 | KY117571 | Whitehead's Spiny Rat  | <i>Maxomys</i>      | <i>whiteheadi</i>    | 16316 | Keruing Trail, FRIM, Kepong, Selangor, Malaysia | FRIM                                           | 13/3/2013  | FMS/FP |
| 28 | KY117568 | Whitehead's Spiny Rat  | <i>Maxomys</i>      | <i>whiteheadi</i>    | 16287 | Hutan Simpan Bikam, Perak, Malaysia             | FRIM                                           | 12/2/2011  | FMS/FP |
| 29 | KY117569 | Whitehead's Spiny Rat  | <i>Maxomys</i>      | <i>whiteheadi</i>    | 16429 | Bukit Tapah, Perak, Malaysia                    | FRIM                                           | 23/3/2011  | FMS/FP |
| 30 | KY052142 | Indian muntjac         | <i>Muntiacus</i>    | <i>muntjak</i>       | 16354 | West Java, Indonesia                            | Vienna NHM                                     | 1858       | RM     |
| 31 | KY117559 | Bornean yellow muntjac | <i>Muntiacus</i>    | <i>atherodes</i>     | 16354 | Koemai, West Borneo                             | Bonn NHM                                       | 1938       | RM     |
| 32 | KY117573 | Dark-tailed Tree Rat   | <i>Niviventer</i>   | <i>cremoriventer</i> | 16322 | Track 5 (G.Inas), Kedah, Malaysia               | FRIM                                           | 5/11/2009  | FMS/FP |
| 33 | KY117572 | Dark-tailed tree rat   | <i>Niviventer</i>   | <i>cremoriventer</i> | 16234 | Malaysia                                        | ROM                                            | 17/05/2013 | FMS/FP |
| 34 | KY117600 | Grizzled Leaf Monkey   | <i>Presbytis</i>    | <i>comata comata</i> | 16551 | captive                                         | Howletts Wild Animal Park, UK                  | 23/12/1999 | CR     |
| 35 | KY117601 | Mitred Leaf Monkey     | <i>Presbytis</i>    | <i>mitrata</i>       | 16555 | captive                                         | Howletts Wild Animal Park, UK                  | 12/11/1998 | CR     |
| 36 | KX857784 | Leopard cat            | <i>Prionailurus</i> | <i>bengalensis</i>   | 16989 | Thailand                                        | American Museum of National History, New York. | 25/02/1924 | PRP    |

|    |          |                          |                       |                        |       |                                     |                                        |            |        |
|----|----------|--------------------------|-----------------------|------------------------|-------|-------------------------------------|----------------------------------------|------------|--------|
| 37 | KY117578 | Annandale's Sundaic Rat  | <i>Rattus</i>         | <i>annandalei</i>      | 16297 | Hutan Simpan Bikam, Perak, Malaysia | FRIM                                   | 12/2/2011  | FMS/FP |
| 38 | KY117577 | Annandale's Sundaic Rat  | <i>Rattus</i>         | <i>annandalei</i>      | 16301 | Hutan Simpan Bikam, Perak, Malaysia | FRIM                                   | 11/2/2011  | FMS/FP |
| 39 | KY117583 | Mountain giant Sunda rat | <i>Sundamys</i>       | <i>infraluteus</i>     | 16297 | Malaysia                            | ROM                                    | 18/05/2013 | FMS/FP |
| 40 | KY117585 | Müller's Giant Sunda Rat | <i>Sundamys</i>       | <i>meulleri</i>        | 16326 | Track 1 (G.Inas), Kedah, Malaysia   | FRIM                                   | 5/11/2009  | FMS/FP |
| 41 | KY117584 | Müller's giant Sunda rat | <i>Sundamys</i>       | <i>meulleri</i>        | 16304 | Malaysia                            | ROM                                    | 01/06/2013 | FMS/FP |
| 42 | KY117586 | Brooke's squirrel        | <i>Sundasciurus</i>   | <i>brookei</i>         | 16417 | East Kalimantan, Indonesia          | ROM                                    | 13/06/1993 | FMS/FP |
| 43 | KY117587 | Low's squirrel           | <i>Sundasciurus</i>   | <i>lowii</i>           | 16307 | East Kalimantan, Indonesia          | ROM                                    | 06/06/1993 | FMS/FP |
| 44 | KY117588 | Low's squirrel           | <i>Sundasciurus</i>   | <i>sp</i>              | 16458 | East Kalimantan, Indonesia          | ROM                                    | 21/06/1993 | FMS/FP |
| 45 | KY117595 | Phayre's Langur          | <i>Trachypithecus</i> | <i>phayrei phayrei</i> | 16548 | South West Myanmar                  | Natural History Museum Berlin, Germany | unknown    | CR     |
| 46 | KY117596 | East Javan Ebony Langur  | <i>Trachypithecus</i> | <i>auratus</i>         | 16552 | captive                             | Bristol Zoo, UK                        | 26/10/2010 | CR     |
| 47 | KY117597 | West Javan Ebony Langur  | <i>Trachypithecus</i> | <i>mauritus</i>        | 16554 | West Java, Indonesia                | Naturalis Leiden; Netherlands          | unknown    | CR     |
| 48 | KY117590 | Long-tailed porcupine    | <i>Trichys</i>        | <i>fasciculata</i>     | 16328 | Borneo                              | ZM, KU                                 | 5/10/1894  | FMS/FP |

ZM, KU: Zoological Museum, University of Copenhagen; ROM: Royal Ontario Museum; FRIM: Forest Research Institute, Malaysia; NHM: Natural History Museum









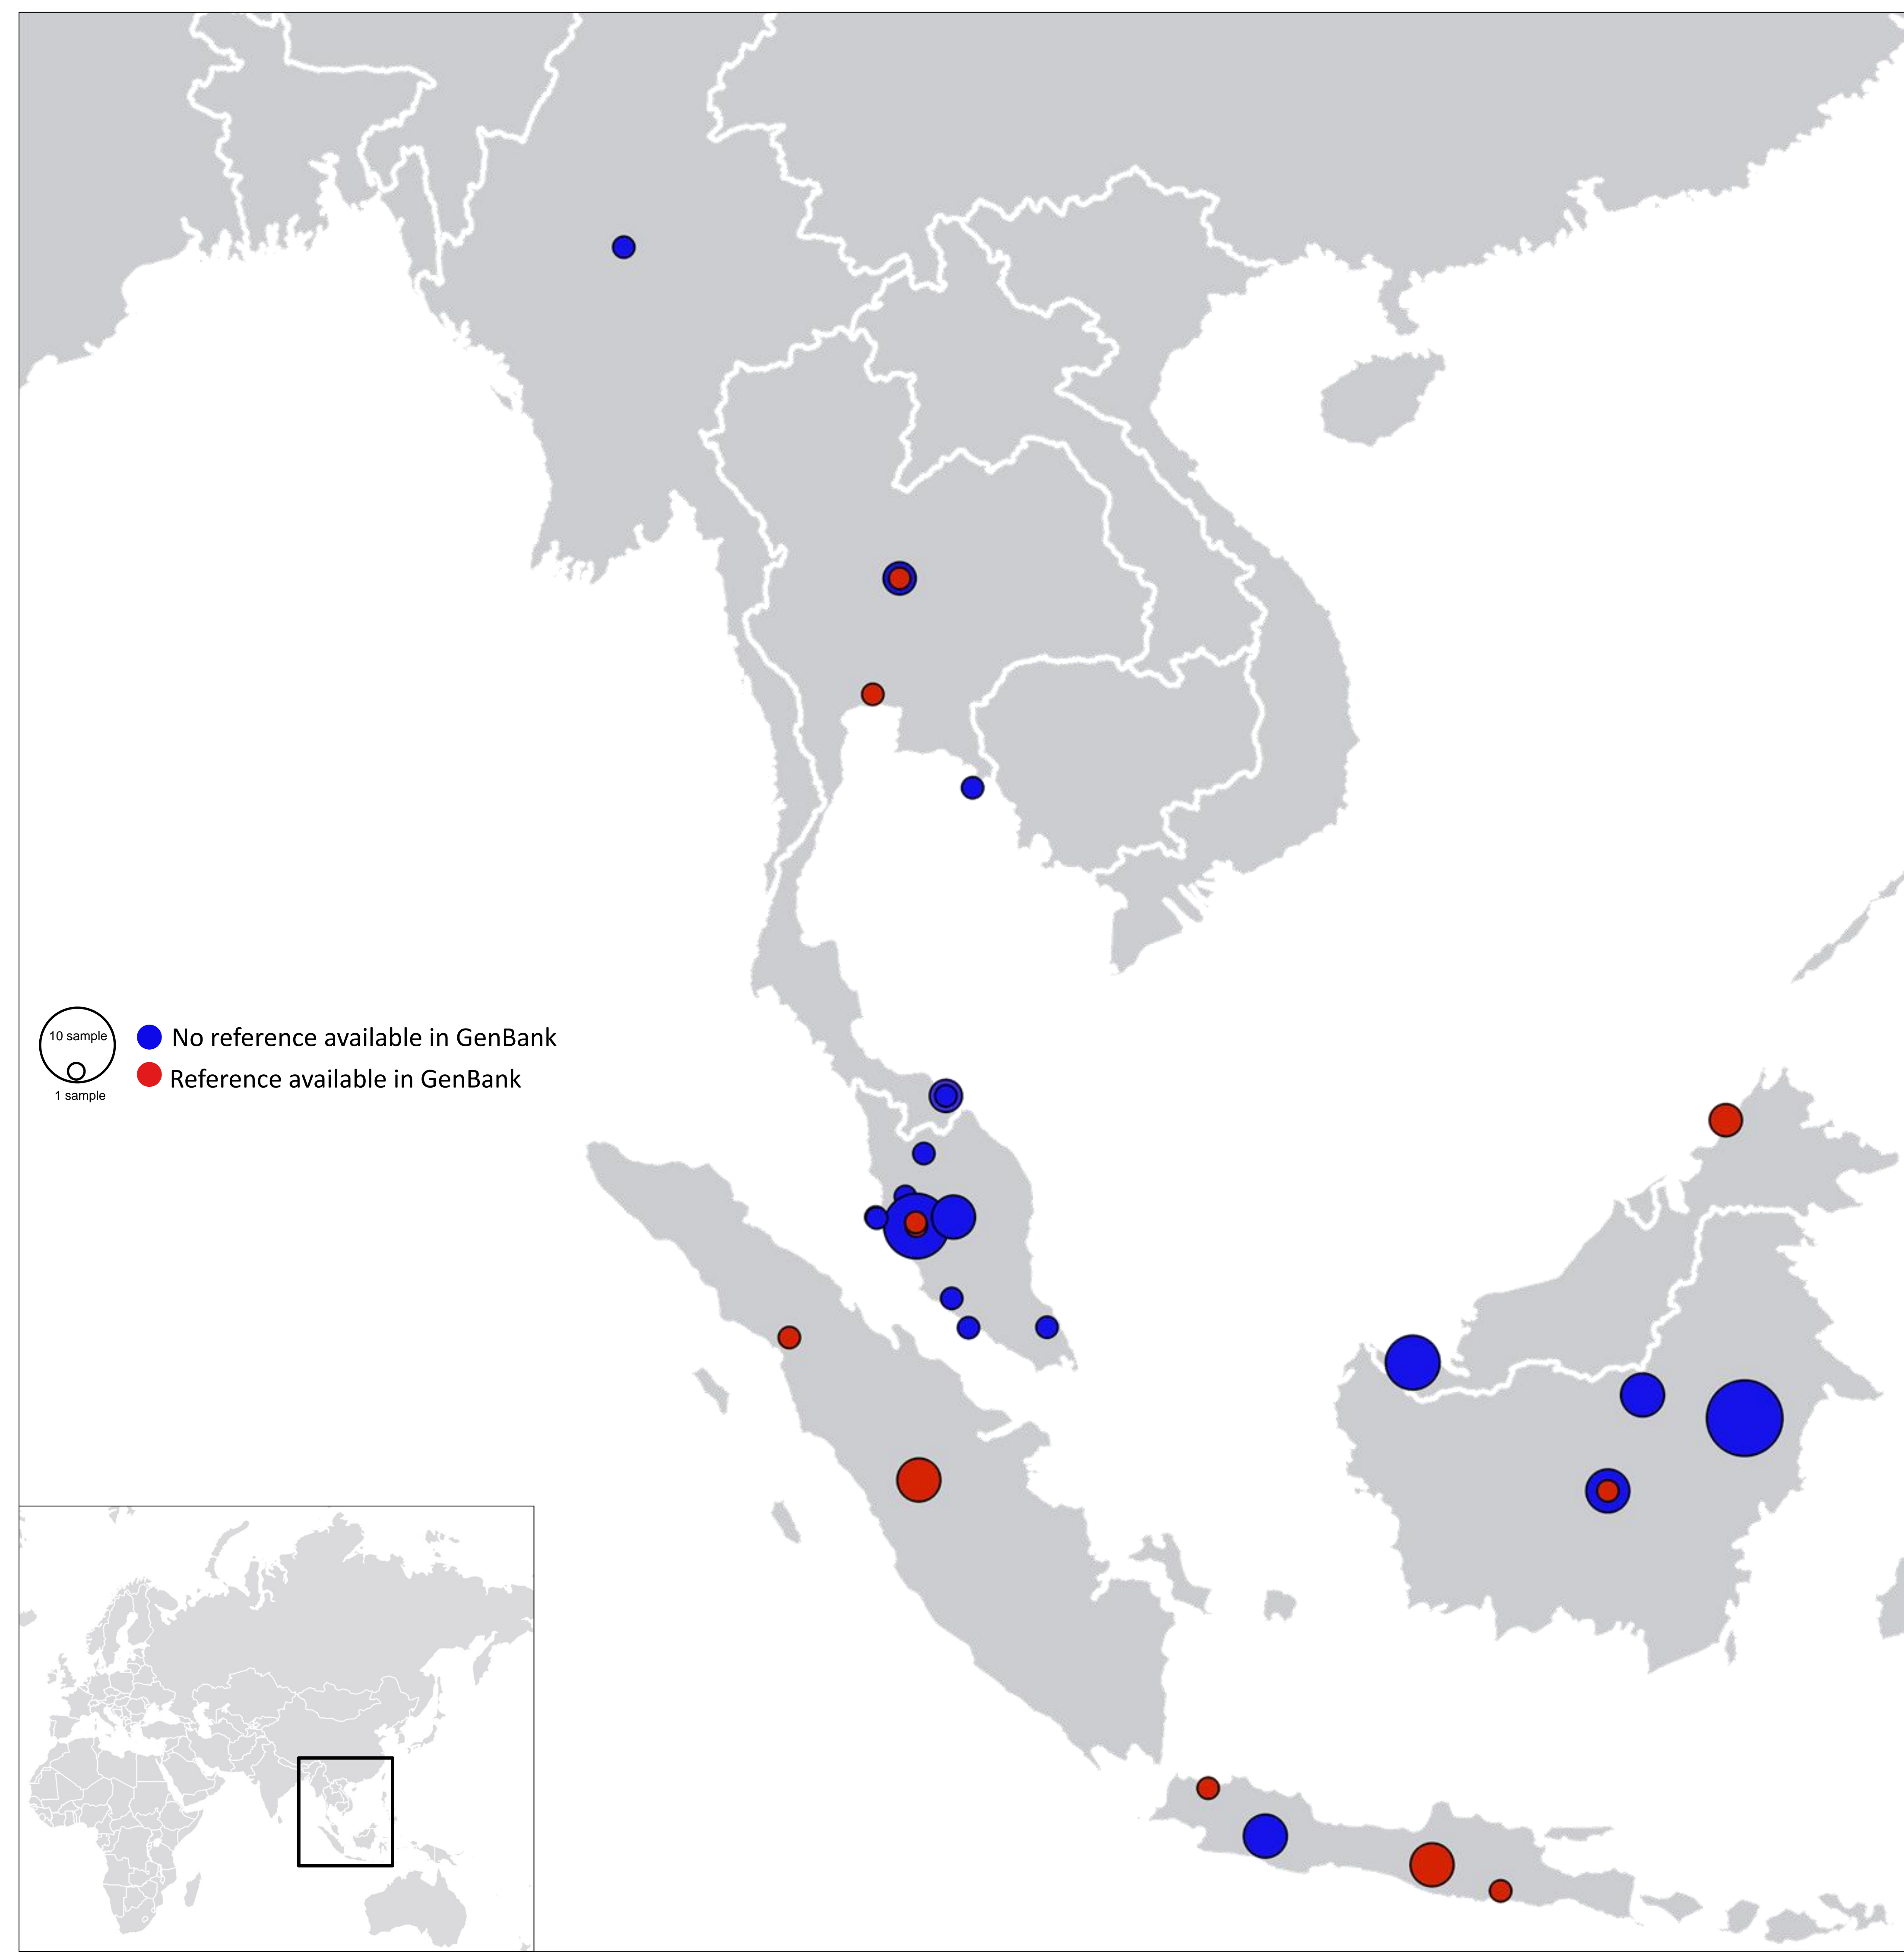





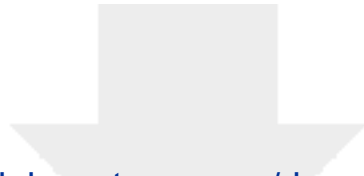

Click here to access/download  
**Supplementary Material**  
READMEsallehetal.txt

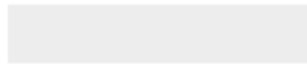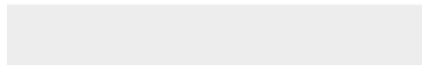

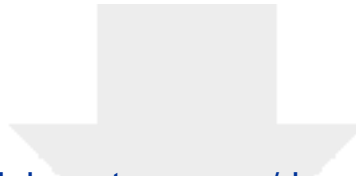

Click here to access/download

**Supplementary Material**

1DatainformationSallehetal.docx

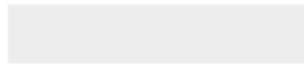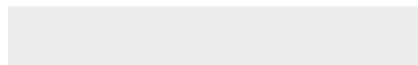



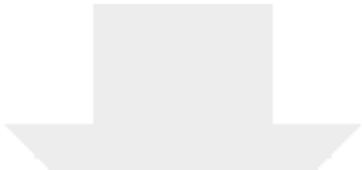

Click here to access/download  
**Supplementary Material**  
5 Additional file 2.xlsx



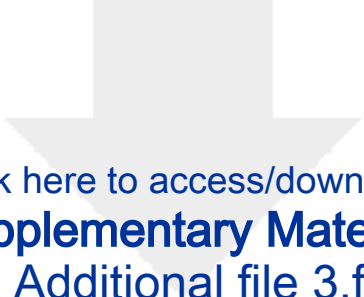

Click here to access/download  
**Supplementary Material**  
5 Additional file 3.fa



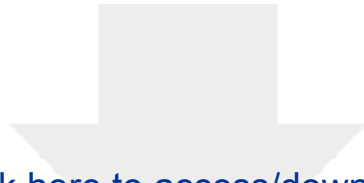

Click here to access/download  
**Supplementary Material**  
5 Additional file 4 newick.txt

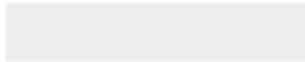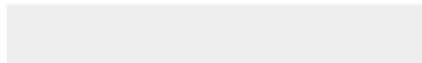



[Click here to access/download](#)

**Supplementary Material**

5Additional file 1\_CR 150617.docx

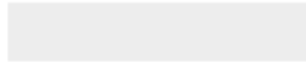

1 **Reviewer reports:**2 **Reviewer #2:** Douglas Yu

3 This paper should be published, and the mitogenomes will come in handy. I did, however,  
4 check genbank for the assemblies, but they are mostly not available (the two *Catopuma*  
5 assemblies are available but under a separate paper). are the assemblies under publication  
6 embargo? I have no other comments. [Yes, the data is currently still under publication embargo.](#)

8 **Reviewer #1:** John-James Wilson

9 Thank you for this opportunity to review a GigaScience Data Note.

10 This is an important dataset (as the authors nicely explain) with a vast range of potential  
11 usages. In particular, this dataset could be an invaluable resource to the application of mammal  
12 monitoring via eDNA and iDNA approaches in Southeast Asia, which is an applied research  
13 area in which my lab has done some preliminary work [Genome, 2016, 59(11): 1008-1022,  
14 10.1139/gen-2015-0193].

15 The data all appears to be readily available and has been generated following standard  
16 protocols from a variety of collections and labs from around the world. As such, this Data Note  
17 represents an impressive collaboration. Given that this is largely novel data, any discrepancies  
18 in terms of species identifications etc., will only become apparent as more similar data  
19 accumulates, and through incorporation of this data into future analyses. Therefore the release  
20 of this data is commendable.

21  
22 Consequently, my comments are restricted to minor issues regarding the context of the data  
23 and the presentation of the Data Note.

25 **Abstract**

26 - The title and abstract highlight Southeast Asia, but samples were obtained from localities as  
27 geographically widespread as Sri Lanka (South Asia) and Taiwan (East Asia). While these  
28 samples may represent species also found in Southeast Asia (?), it is possible they could be  
29 quite divergent (in their mitochondrial sequences) from conspecifics from Southeast Asia  
30 proper. In any case, it would be good to justify how the selection of samples obtained for  
31 mitogenome sequencing was done, if the authors want to retain the emphasis on this  
32 geographic region.

34 [We have removed the three samples below, now making the total mitogenomes 72.](#)

35

| No | ID  | Voucher | Genebank ID | Genus            | Species          | Locality                     |
|----|-----|---------|-------------|------------------|------------------|------------------------------|
| 43 | MRE | 20805.a | KY117561    | <i>Muntiacus</i> | <i>reevesi</i>   | Shin-Yi, Taiwan              |
| 17 | 54  | CN2322  | KY117547    | <i>Herpestes</i> | <i>hosei</i>     | Ceylon                       |
| 45 | MVA | 91131   | KY052092    | <i>Muntiacus</i> | <i>vaginalis</i> | Gangtok, South Sikkim, India |

36

37

38

- 39 - Mitochondrion barcodes or mitochondrial barcodes? [Corrected to mitochondrial barcodes](#)  
40  
41 - The phrase "we have contributed to this need" is a bit confusing. A better phrase may be "we  
42 have partially addressed this need".[corrected](#)  
43  
44 - It may be clearer to say the 32 species had no previous mitogenome available rather than  
45 have no current mitogenome available. [corrected](#)  
46  
47 - It would be good to say how mammal species from SEA now have mitogenomes available.  
48 What percentage do the 32 novel mitogenomes from this study contribute?  
49 [Currently there are 922 mammalian mitogenomes available in Genbank. Unfortunately most are](#)  
50 [not tagged by location/origin. Data mining through manual screening of each mitogenomes](#)  
51 [resulted in 174 terrestrial mammal species which are typical to SE Asia. In this work, 30 novel](#)  
52 [species are added, contributing to ~17% expansion of the current SE Asia mammal](#)  
53 [mitogenome database. You can view the full list in the link below:](#)  
54 [https://docs.google.com/spreadsheets/d/1t3pkxCMKbogQjX5YfLGW1waDaD9NL1\\_eMYzI5CdF](https://docs.google.com/spreadsheets/d/1t3pkxCMKbogQjX5YfLGW1waDaD9NL1_eMYzI5CdFoJo/edit#gid=611706729)  
55 [oJo/edit#gid=611706729](https://docs.google.com/spreadsheets/d/1t3pkxCMKbogQjX5YfLGW1waDaD9NL1_eMYzI5CdFoJo/edit#gid=611706729)  
56  
57 - I'm not sure why Malaysia is a keyword given the broad range of countries from which samples  
58 were obtained? [removed](#)  
59

#### 60 **Data description**

- 61 -The context is a bit brief, but may be adequate for a Data Note?  
62  
63 -Could GPS coordinates be given in table 1 and 2? I would find this more useful than the map.  
64 [The GPS locations are given in Additional file 2. We decided not to add them in Tables 1 and 2 because](#)  
65 [most samples, especially museum specimens don't have their exact location documented \(e.g Sumatra\).](#)  
66 [The GPS presents a rough location with accuracy around 100 km. Thus, we thought the map would be](#)  
67 [better to show the mitogenome distribution in this work.](#)  
68  
69  
70 -In the tables I suggest not to italicise the vernacular English name, to avoid confusion with  
71 scientific names. [corrected](#)  
72  
73 -In the tables, in the assembly size column, sometimes a comma is used and other times not.  
74 [corrected](#)  
75  
76 -Museum is miss-spelled in the table footers and in other places in the tables. [corrected](#)  
77  
78 -In my experience West Malaysia is most commonly referred to as Peninsular Malaysia. It would  
79 be good to include states and provinces in the localities if known. Also, it would be good to be  
80 consistent and always put the country name i.e. Sumatra, Indonesia. Besides, a strange spelling  
81 is used for Malacca/Melaka. [corrected](#)  
82

83 -Central Siam is present-day Thailand? Ceylon is Sri Lanka? In general it would be good to  
84 convert all country/state/city names to their currently used forms. The specimen/museum label  
85 form of the locality could be given in another column in the table or in parentheses if necessary.

86 [corrected](#)

87

88

89 -For the DNA extraction protocols (which are given very briefly) it would be good to state that  
90 these are standard protocols- that they were performed following the manufacturer's guidelines  
91 or following given references etc. I know reference are given in a few cases, but not all.

92 [corrected](#)

93

94 -I'm not sure what the phylogenetic analysis contributes to this Data Note.

95 [It shows a clearer taxonomical order distribution of mitogenomes presented in this work.](#)

96

97

98

99

100

101
