# Supplementary material for: An expanded mammal mitogenome dataset from Southeast Asia
Source: PubMed Central journal article supplement (PMC5737531; doi:10.1093/gigascience/gix053), 2017-07-13
Supplement: gix053_response-to-reviewer-comments_revision-1.pdf [file gix053_response-to-reviewer-comments_revision-1.pdf]

## **Author's Response To Reviewer Comments**

1) Add Re-use potential section at the end of the main text.

-Added.

2) Move all URLs in the main text to the references list (see comments in manuscript attached)

-Done.

3) Please add funding information where indicated.

-Done
